# Supplementary material for: One-Pot Synthesis of Isoxazole-Fused Tricyclic Quinazoline Alkaloid Derivatives via Intramolecular Cycloaddition of Propargyl-Substituted Methyl Azaarenes under Metal-Free Conditions
Source: MDPI journal article supplement (doi:10.3390/molecules28062787), 2023-03-20

*Supporting Information*

**One-Pot Synthesis of Isoxazole-Fused Tricyclic Quinazoline Alkaloid Derivatives via Intramolecular Cycloaddition of Methyl Azaarenes under Metal-free Conditions**

Zhuo Wang<sup>1</sup>, Yu-Han Zhao<sup>1</sup>, Jia-Xin Chen<sup>1</sup>, Meng-Yao Chen<sup>1</sup>, Xue-Han Li<sup>1</sup>, Ting Jiang<sup>1</sup>, Fang Liu<sup>1</sup>, Xi Yang<sup>1</sup>, Yuan-Yuan Sun<sup>1</sup> and Yan-Ping Zhu<sup>1,2 \*</sup>

<sup>1</sup> Key Laboratory of Molecular Pharmacology and Drug Evaluation, Ministry of Education, Collaborative Innovation Center of Advanced Drug Delivery System and Biotech Drugs in Universities of Shandong, School of Pharmacy, Yantai University, Shandong, Yantai, 264005, China.

<sup>2</sup> Anhui Laboratory of Molecule-Based Materials, College of Chemistry and Materials Science, Anhui Normal University, Wuhu 241000, China

E-mail: chemzyp@foxmail.com; [chemzyp@ytu.edu.cn](mailto:chemzyp@ytu.edu.cn),

## Table of Contents

|                                                                                  |   |
|----------------------------------------------------------------------------------|---|
| 1. Evidence in support of the hypothetic mechanism .....                         | 3 |
| 2. Copy of $^1\text{H}$ 、 $^{13}\text{C}$ NMR and HR-MS Spectra of Products..... | 4 |

## 1. Evidence in support of the hypothetical mechanism

To gain further insight into the reaction mechanism, some control experiments were performed as illustrated in Scheme S1. To address the possible reaction intermediate, 2-methyl-3-phenylquinazolinone (**5a**) was reacted under the standard conditions for 20 mins, nitrile oxides (**5ac**) could be detected by MS (APCI).

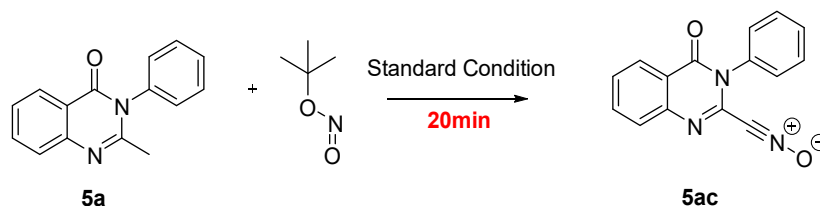

**Scheme S1.** Control experiment of **5a** with TBN.

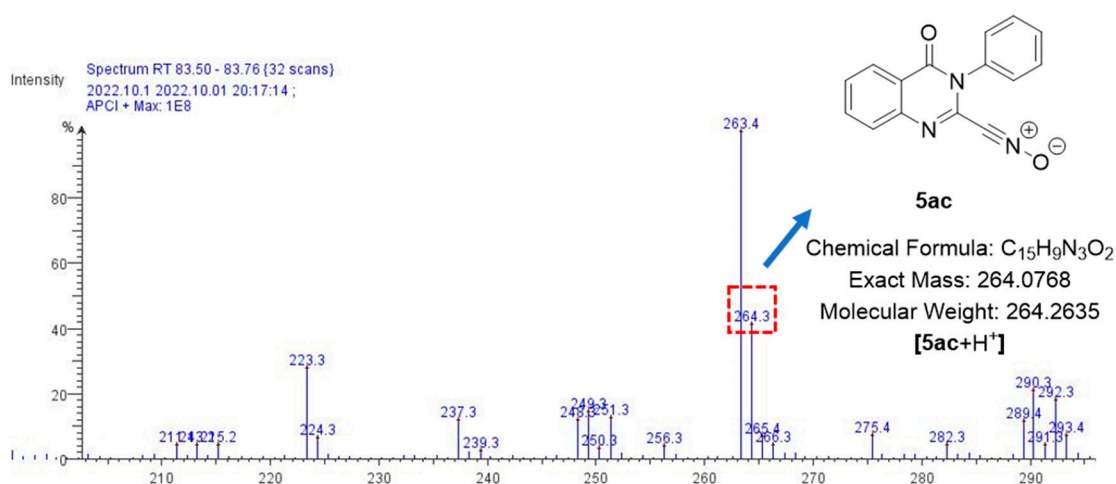

**Scheme S2.** The MS(APCI) results for the reaction of **5a** was reacted under the standard conditions for 20 mins.

## 2. Copy of $^1\text{H}$ 、 $^{13}\text{C}$ NMR and HR-MS Spectra of Products

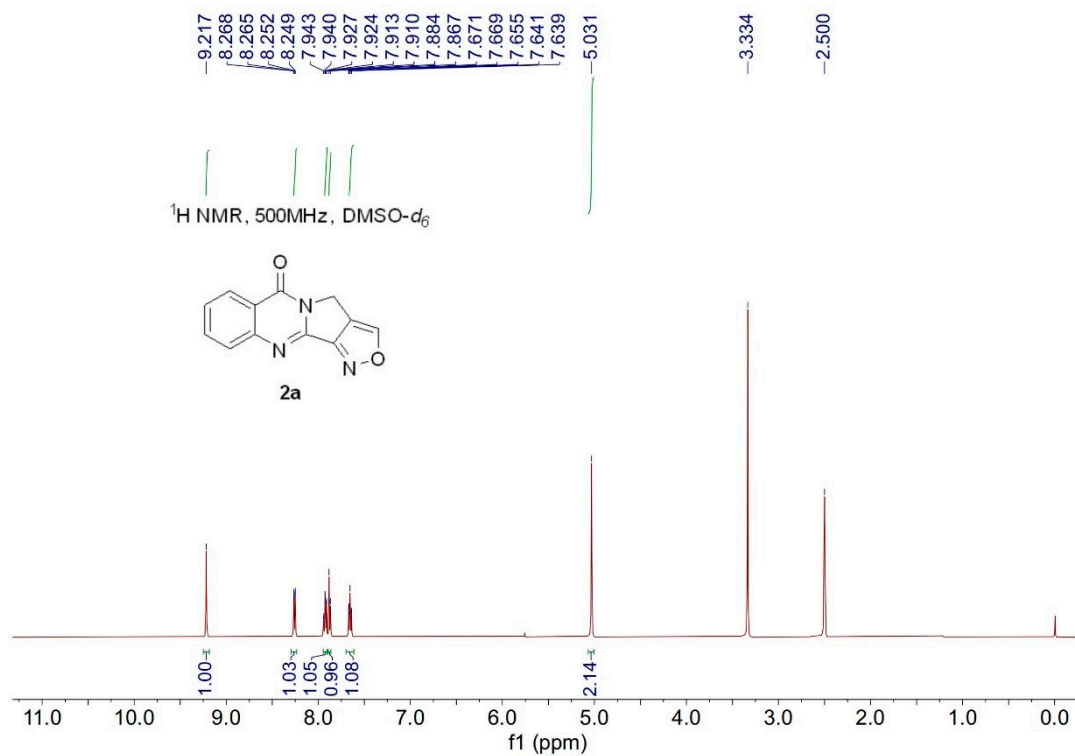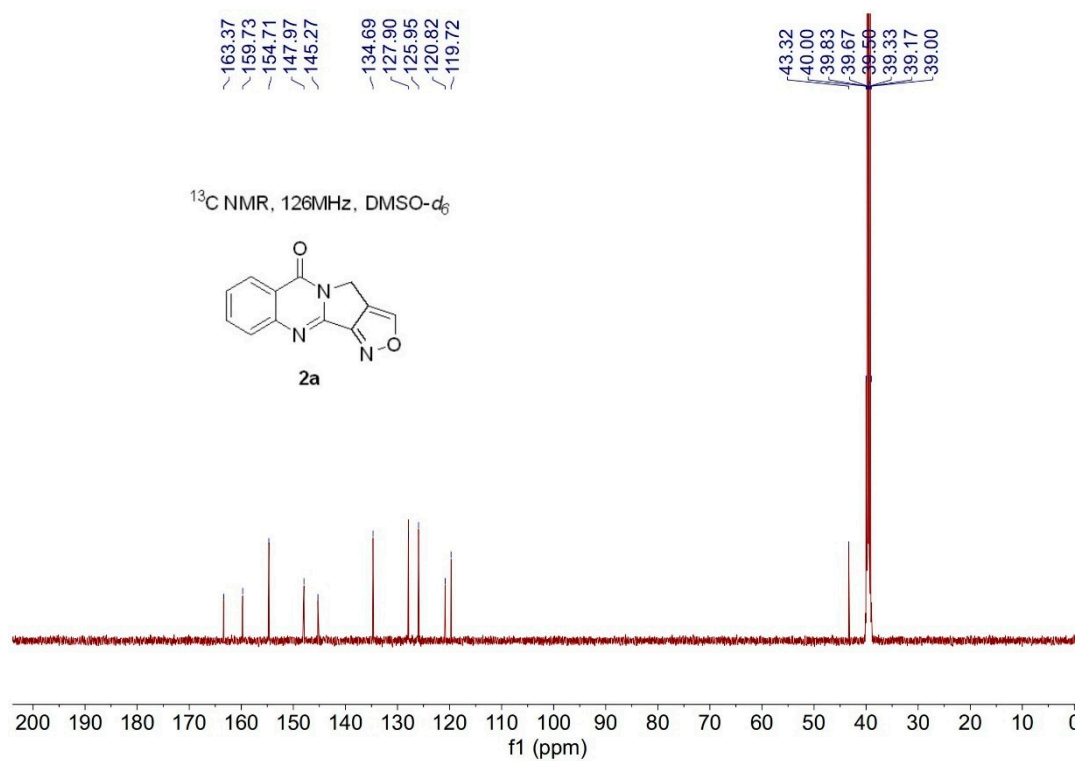



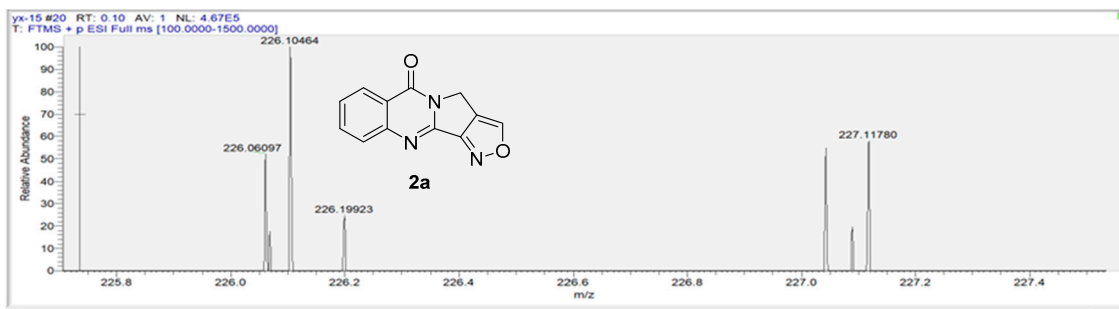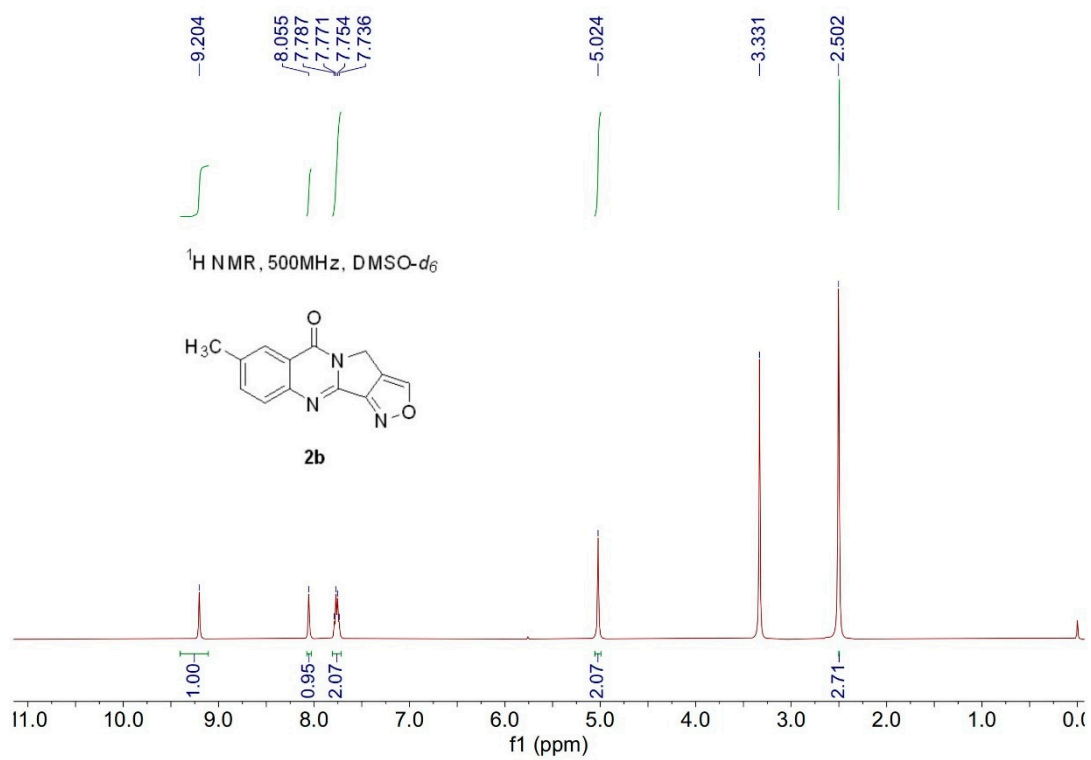

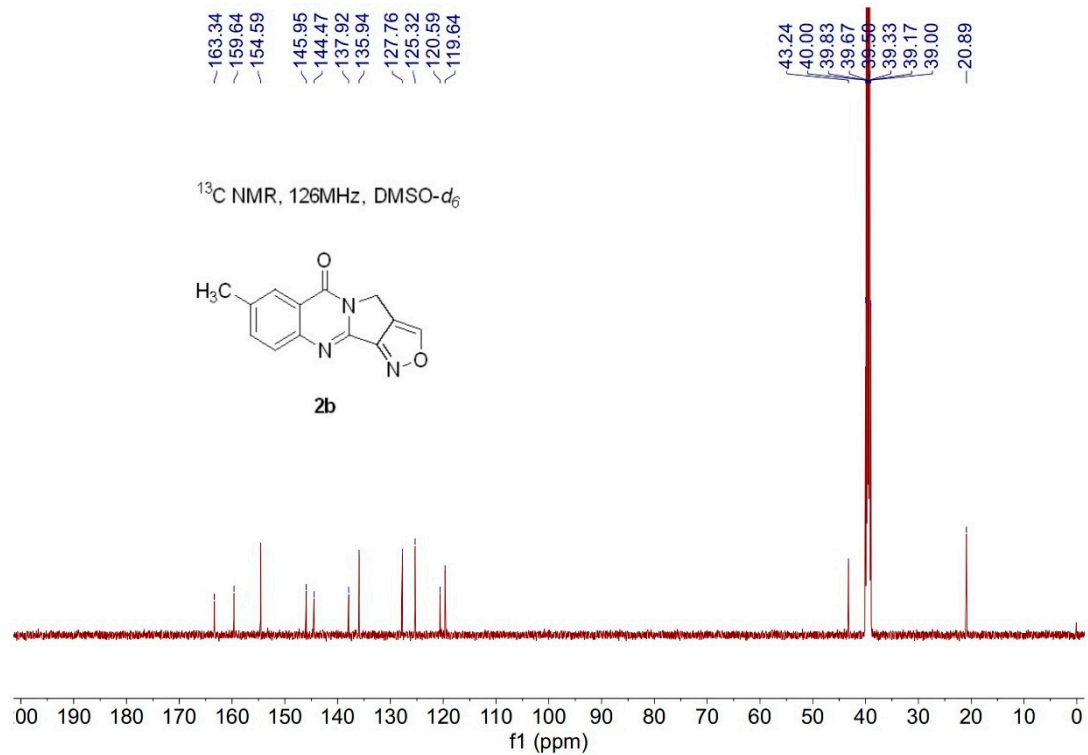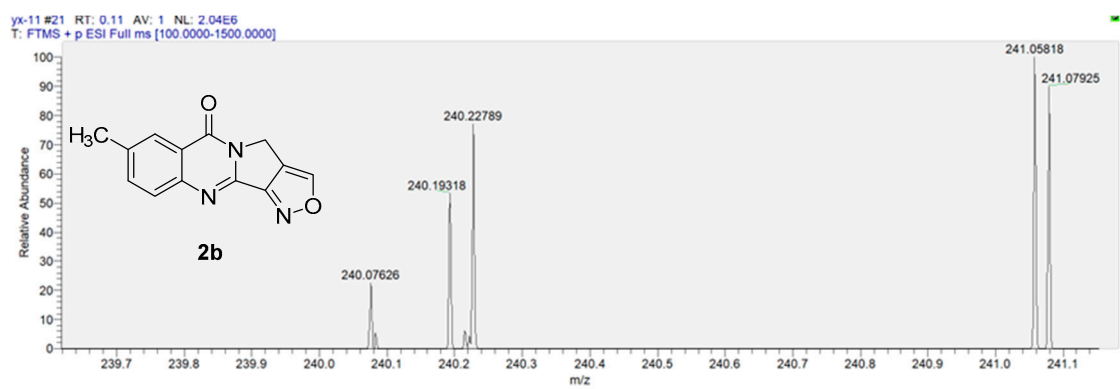

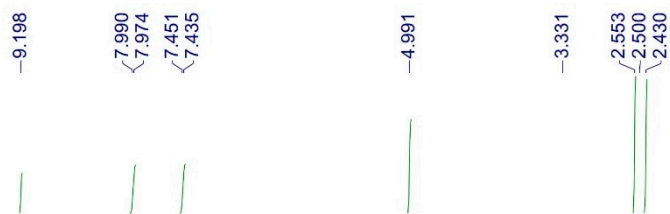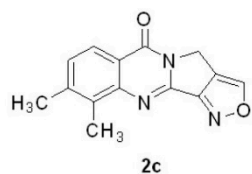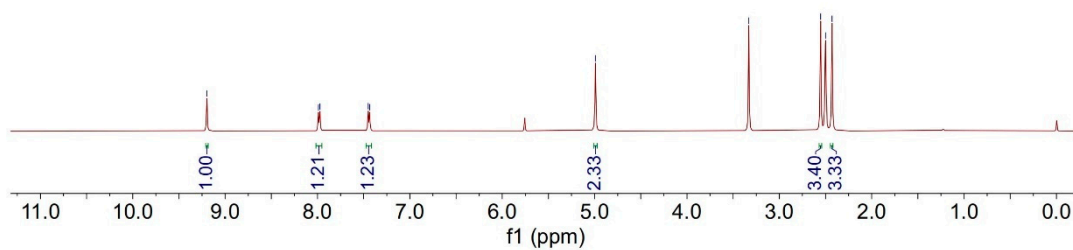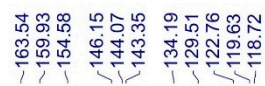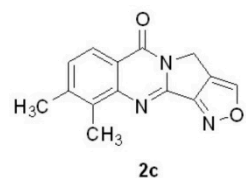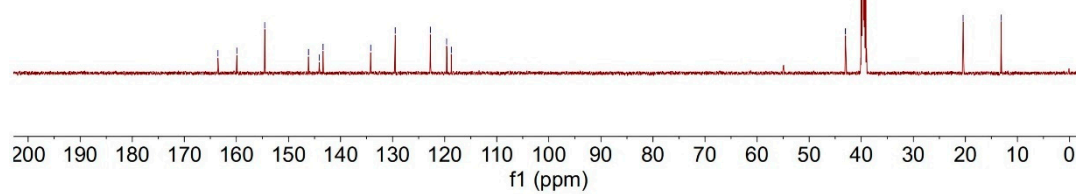

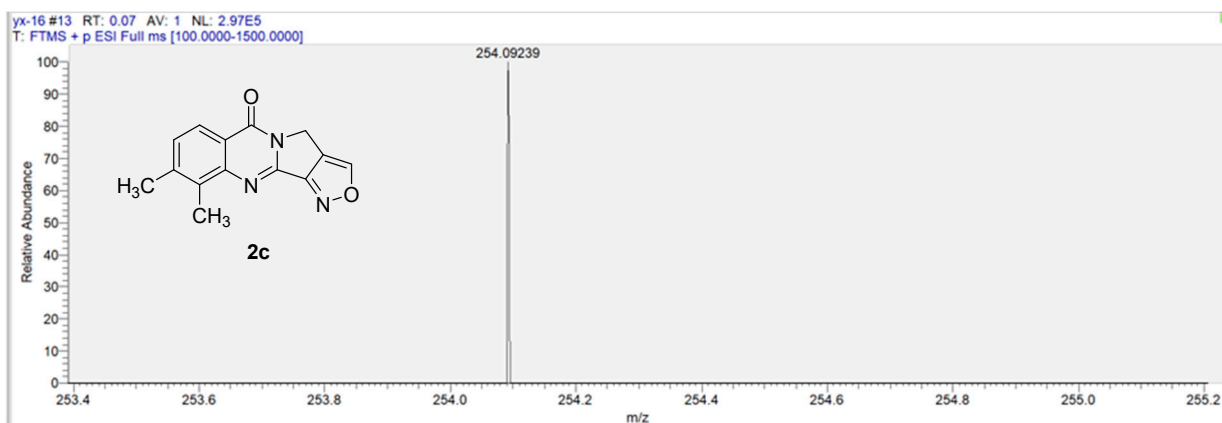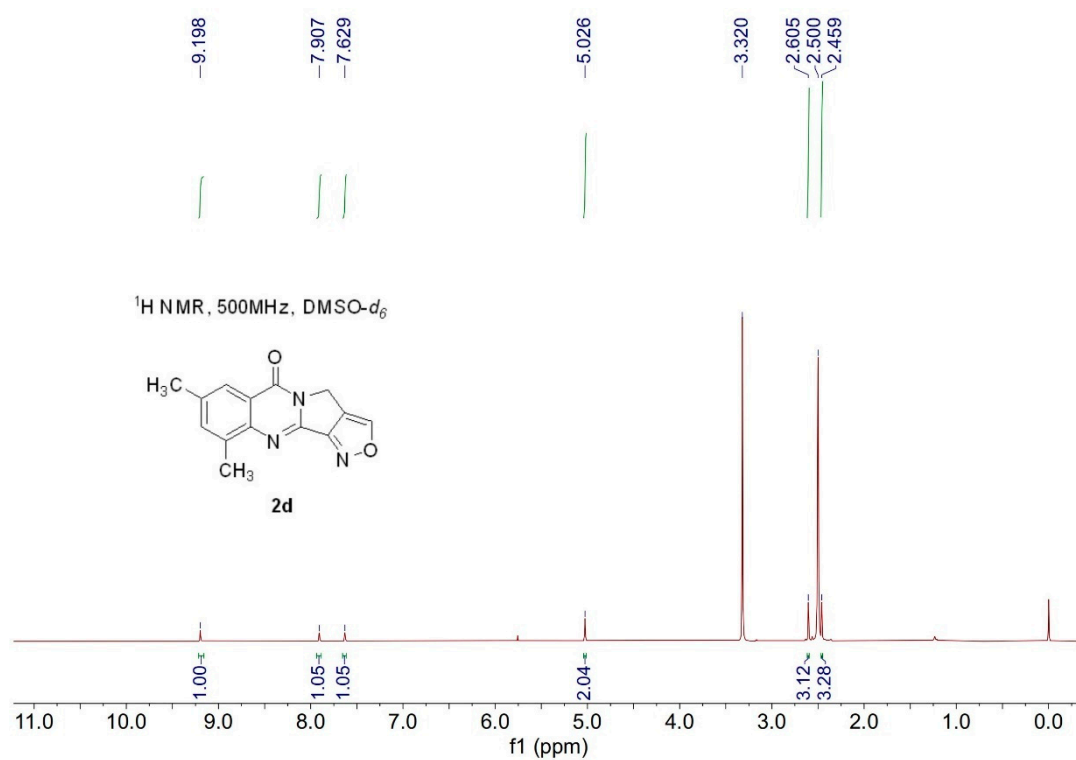

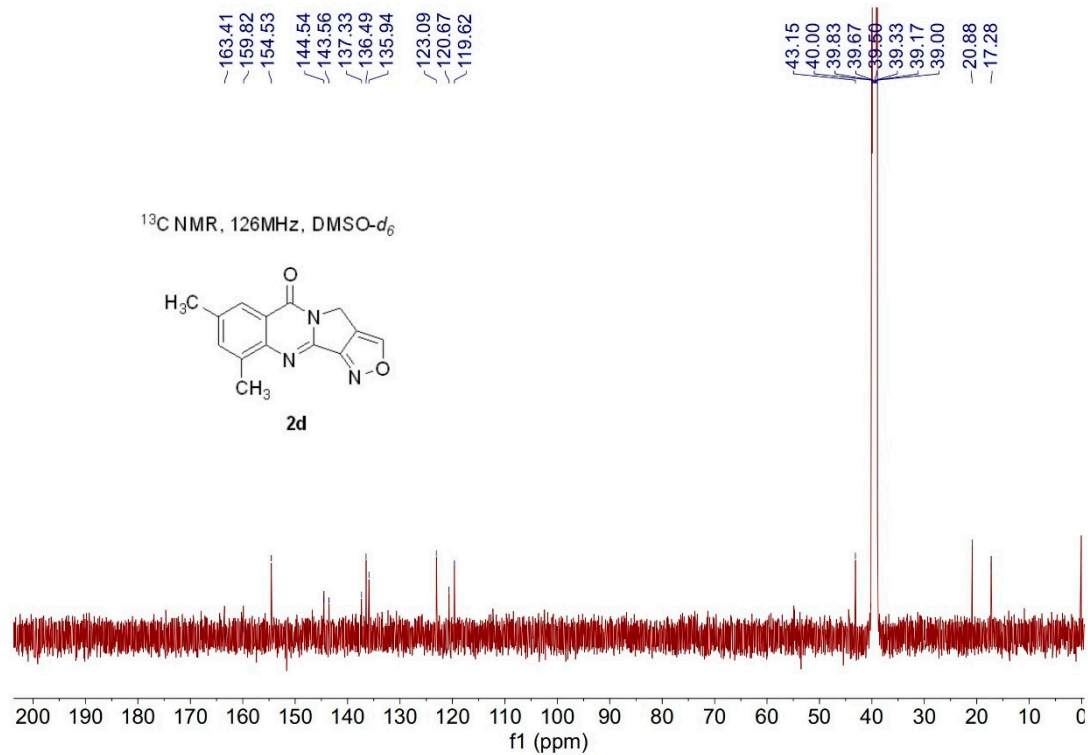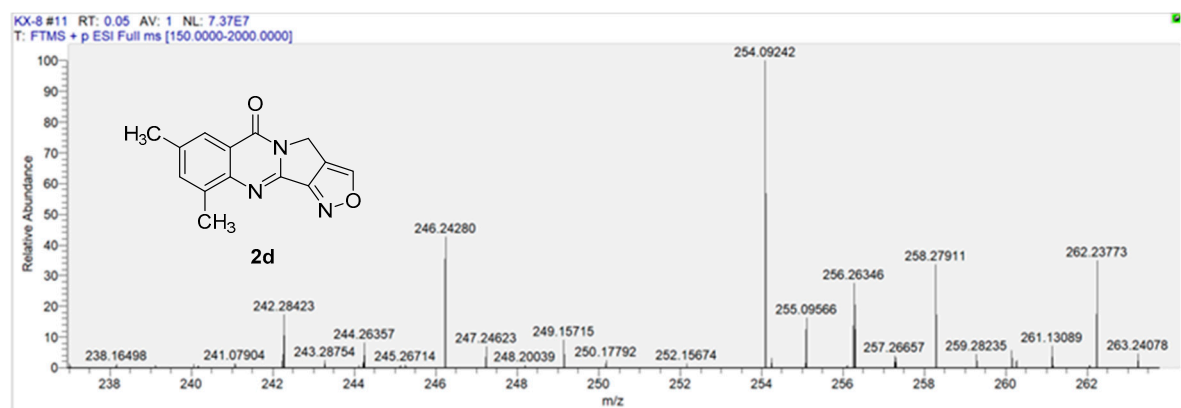

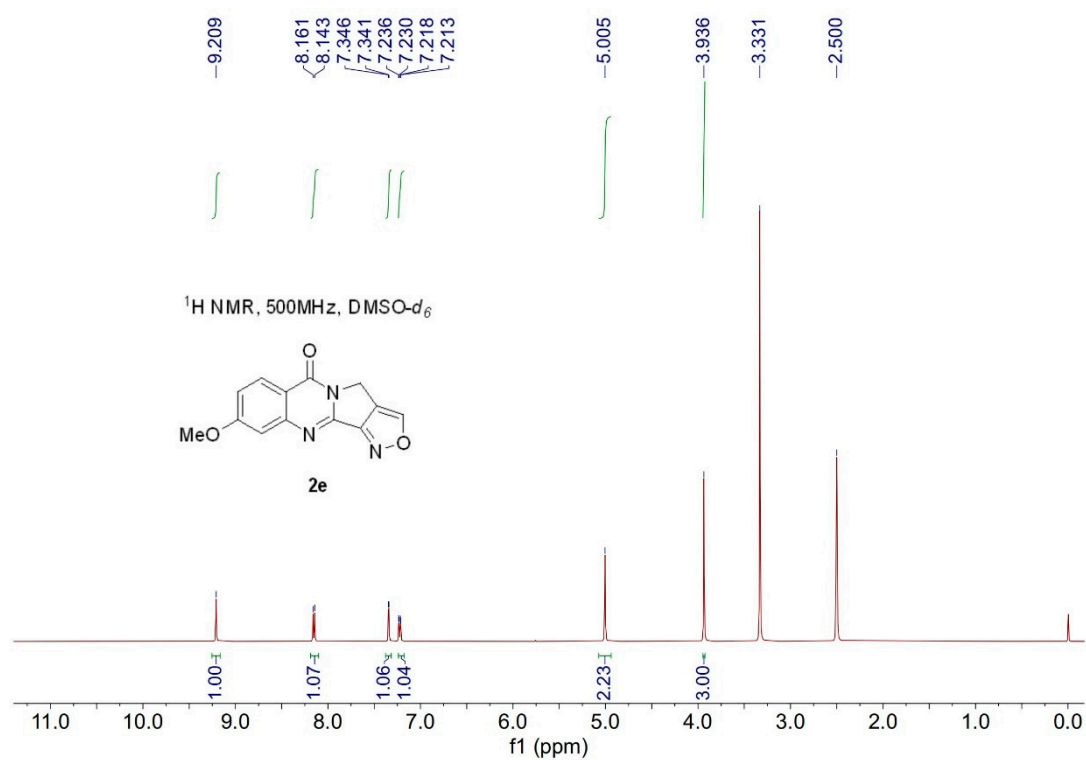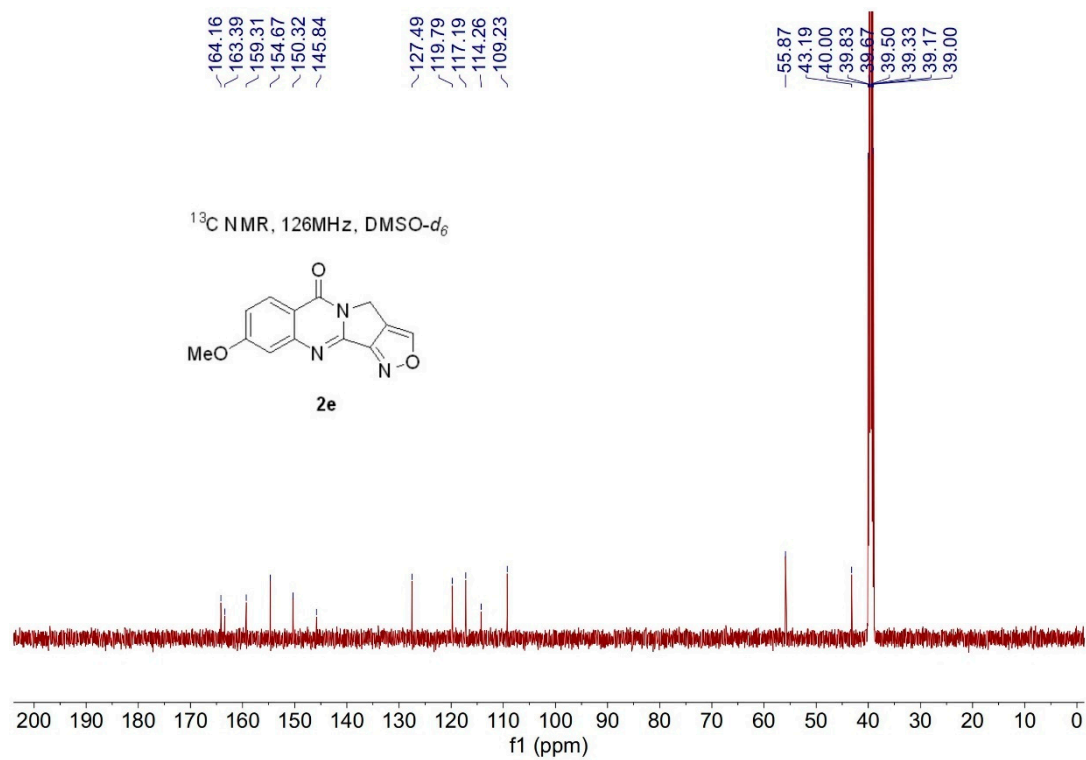

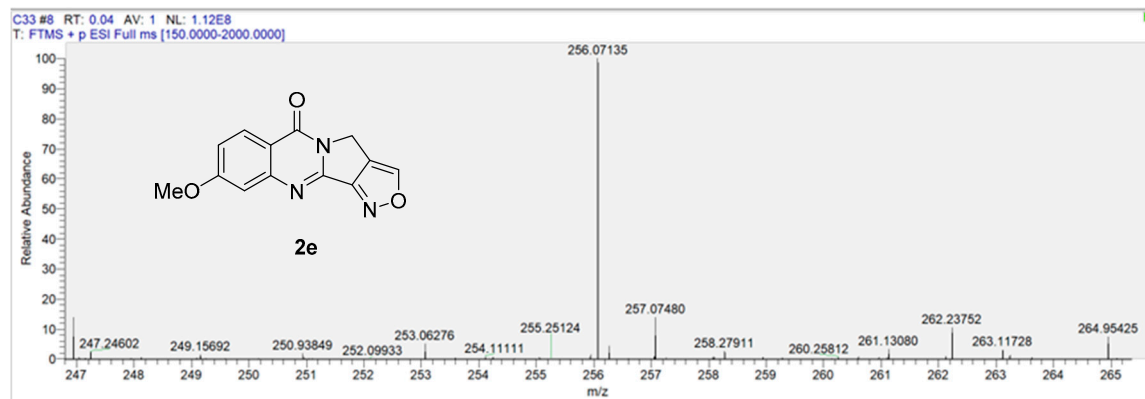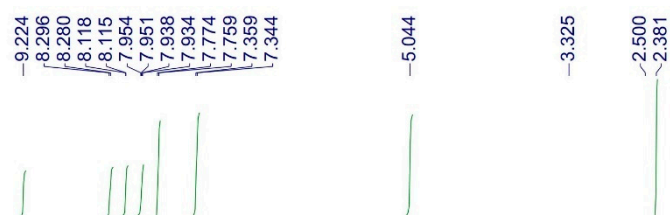

$^1\text{H}$  NMR, 500MHz,  $\text{DMSO}-d_6$

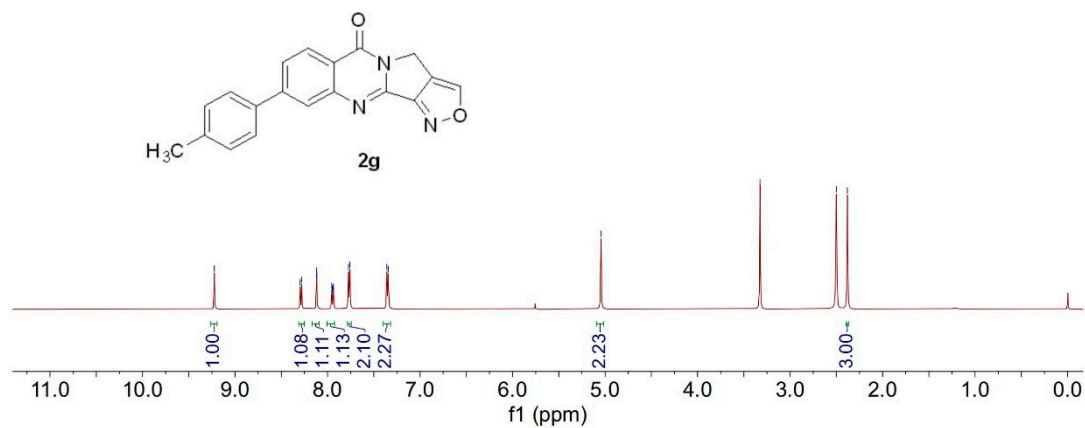

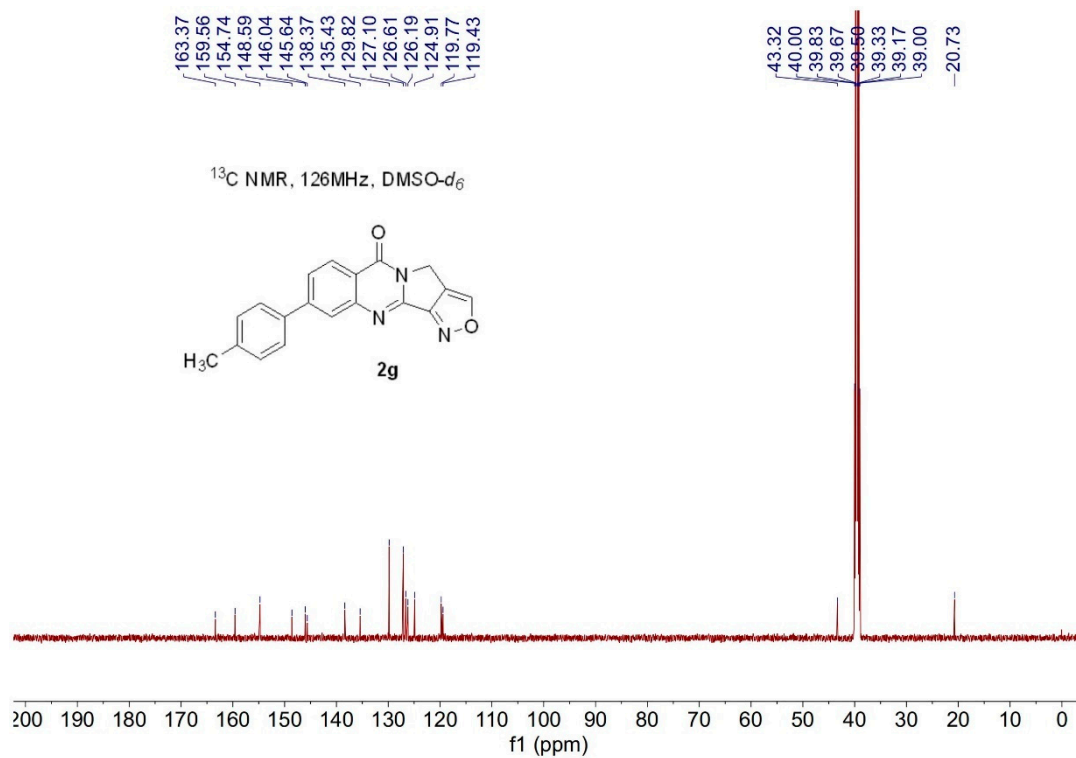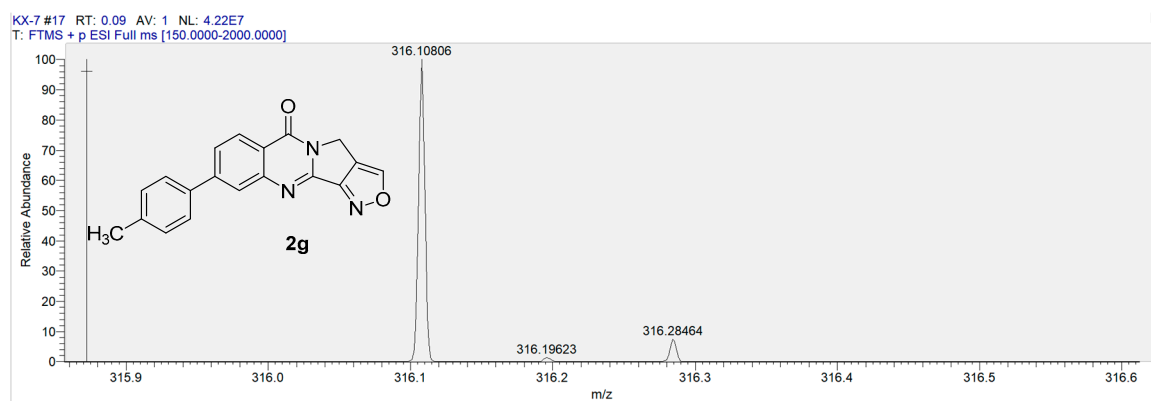



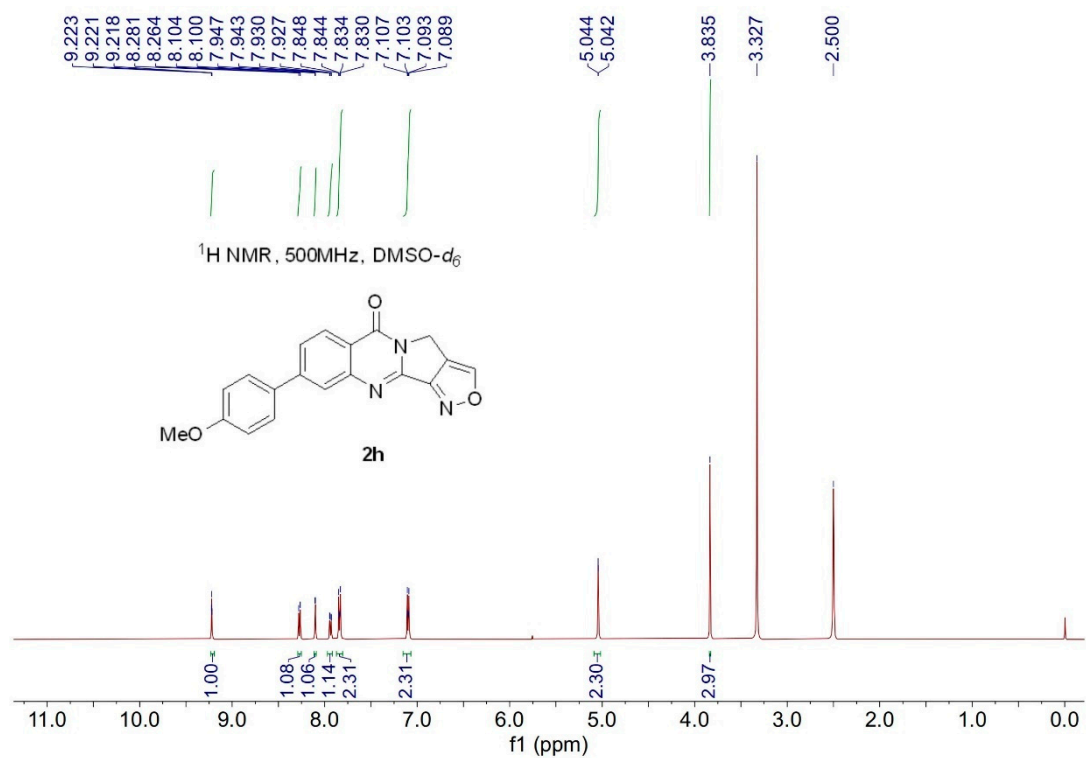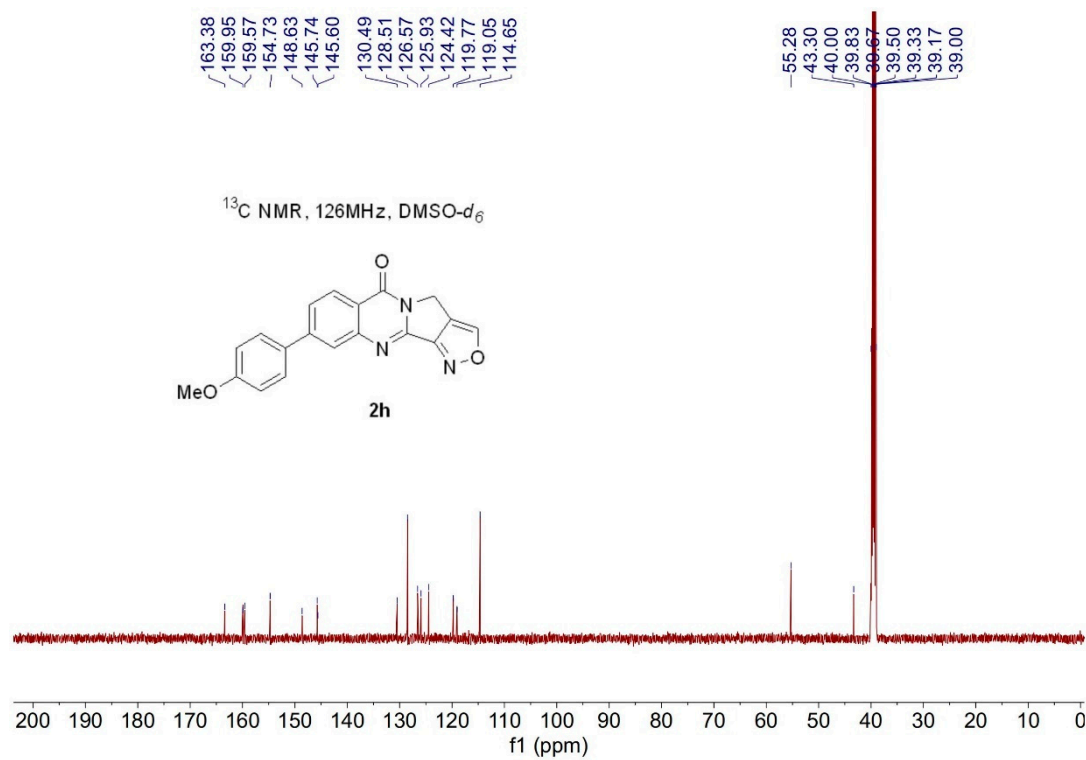

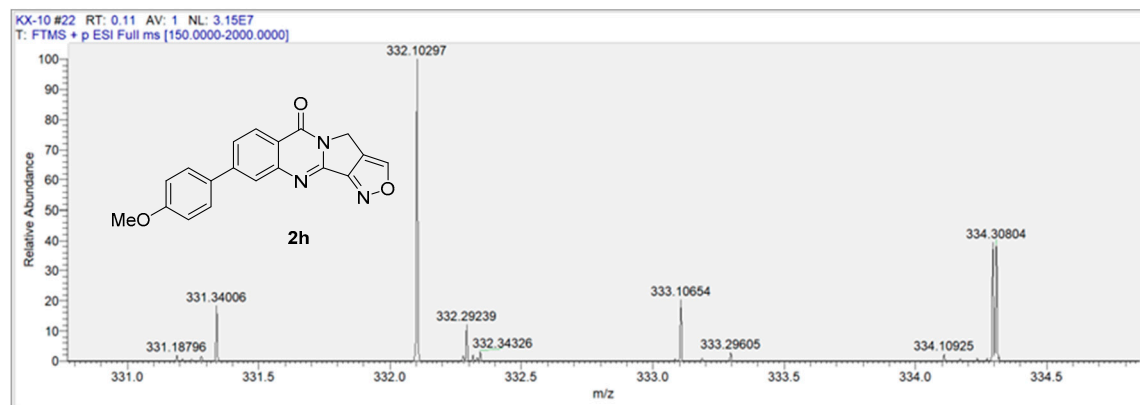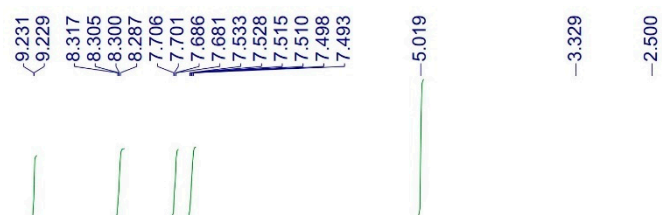

<sup>1</sup>H NMR, 500MHz, DMSO-*d*<sub>6</sub>

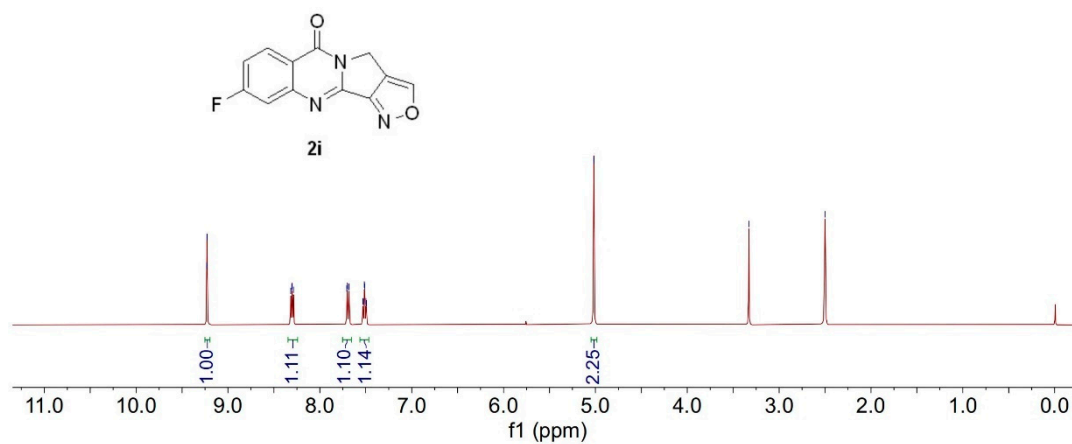

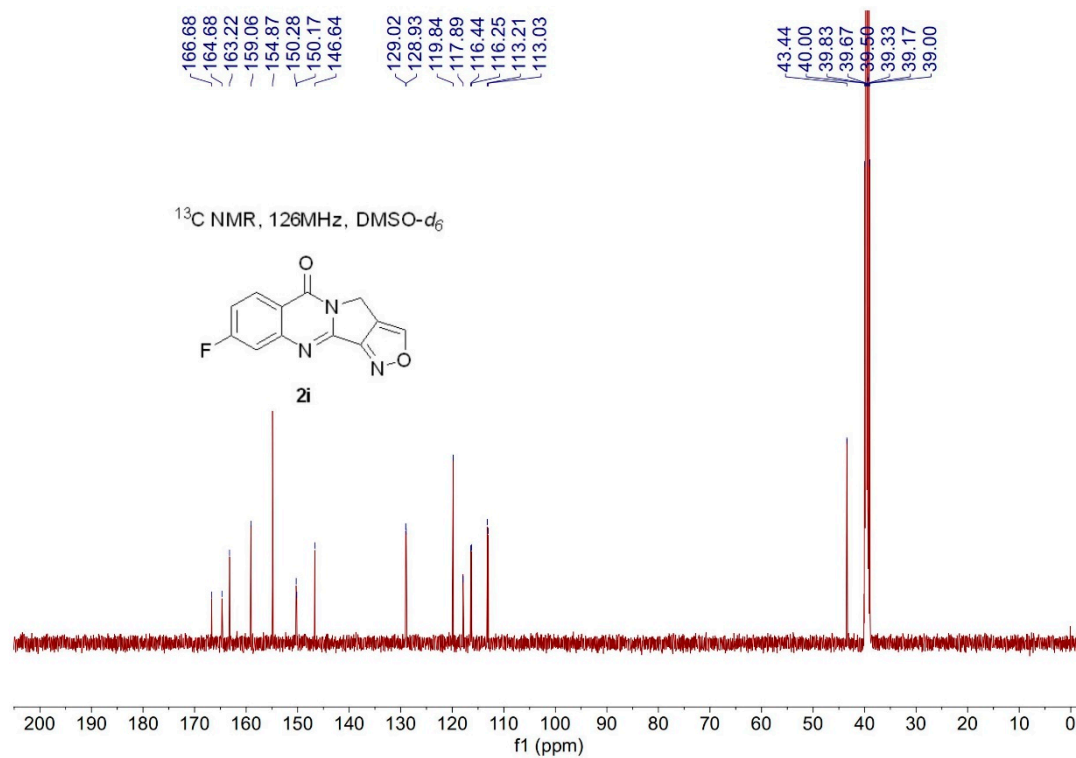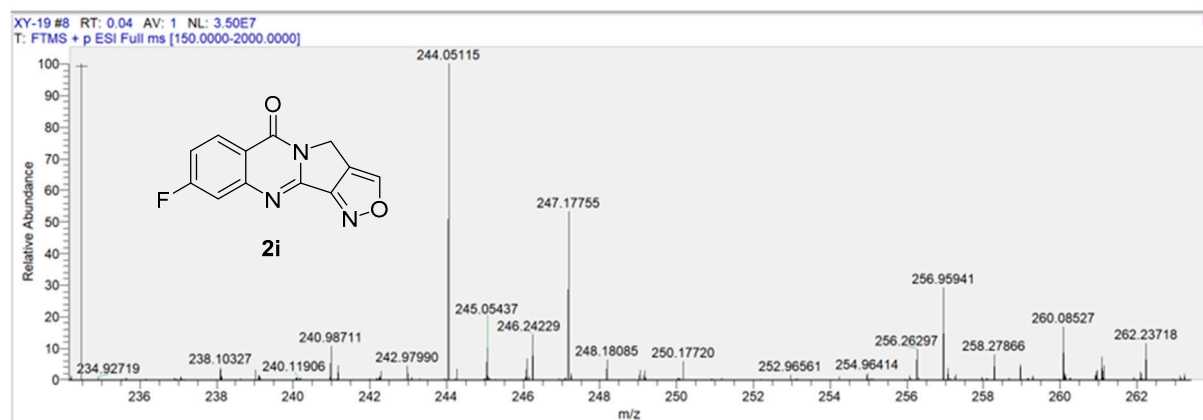

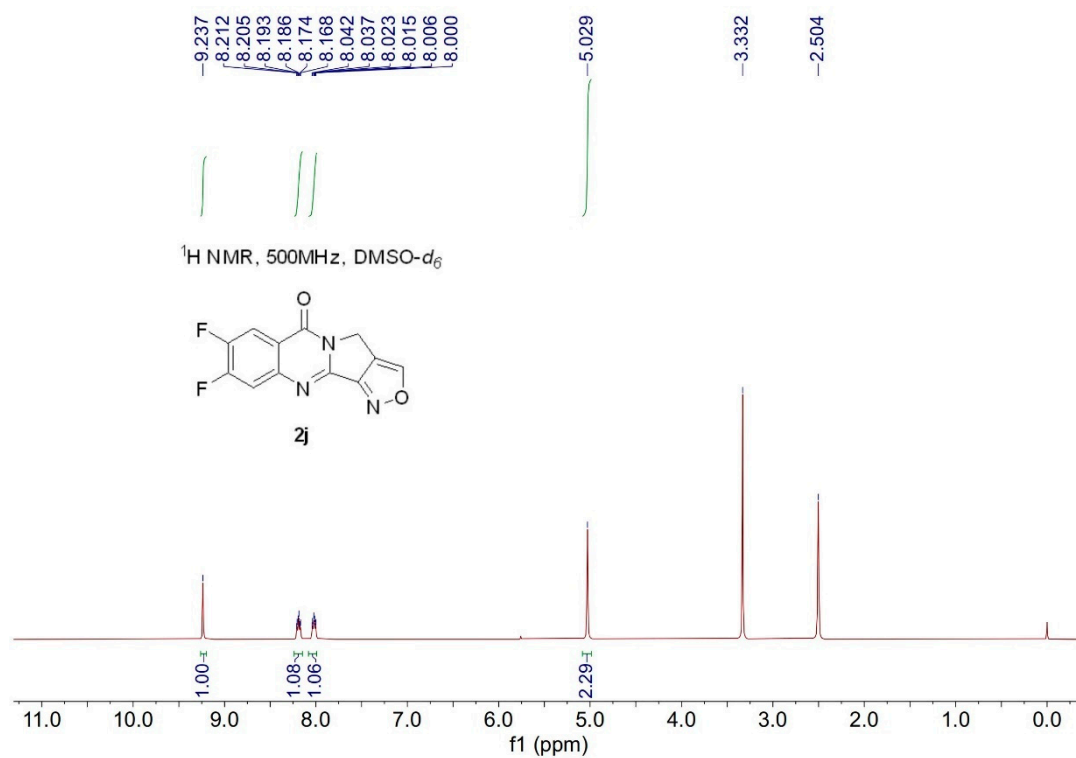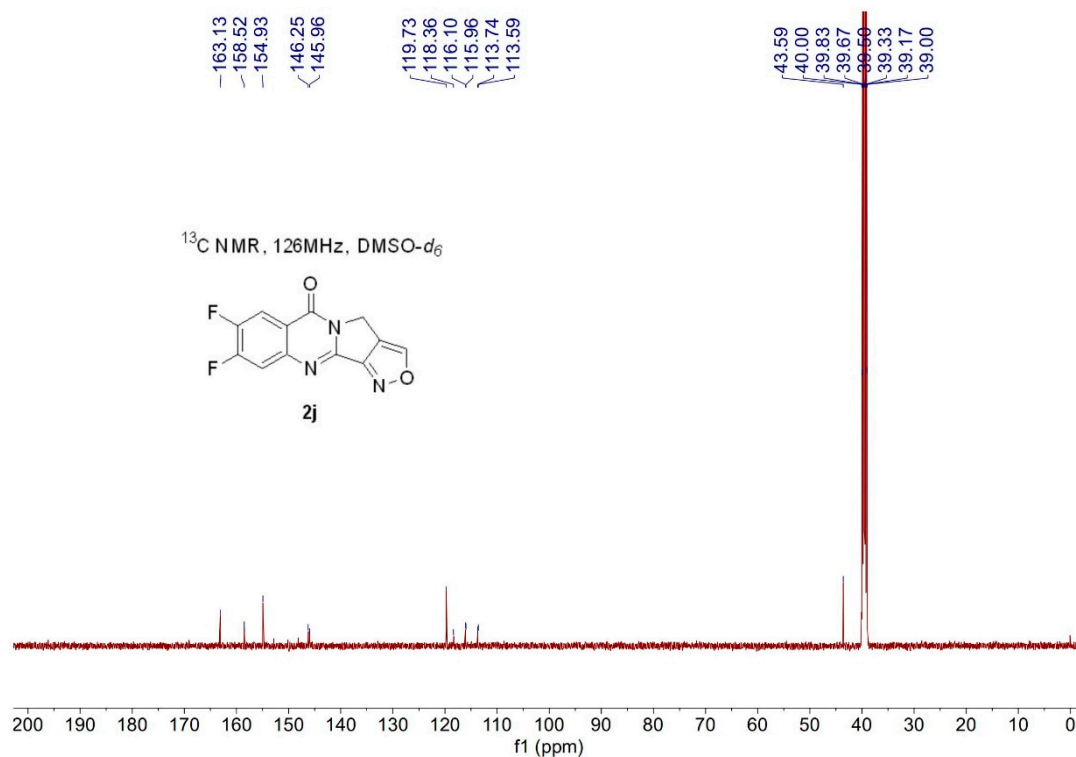

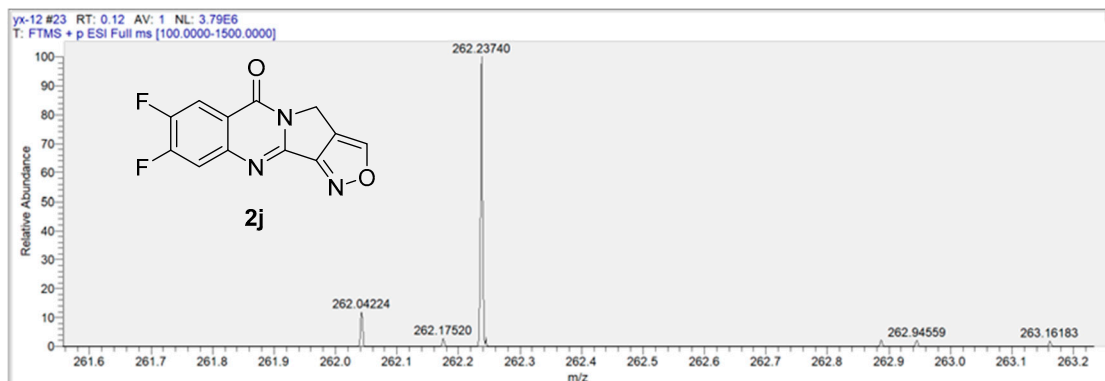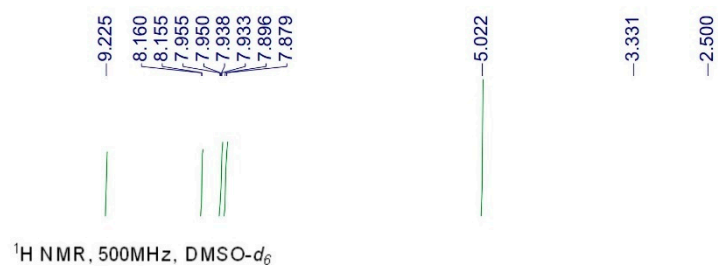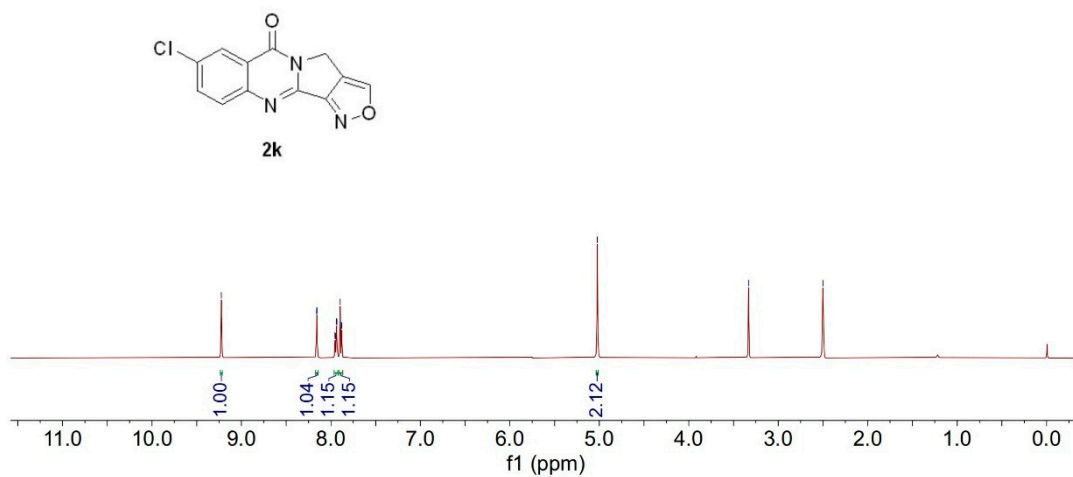

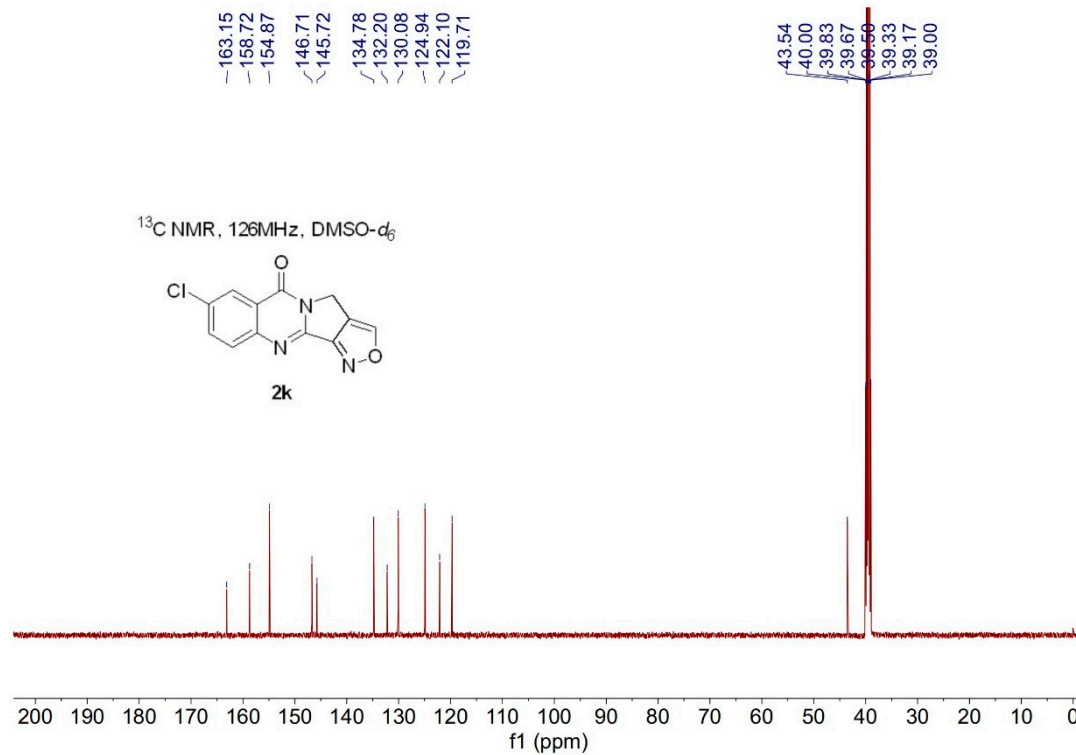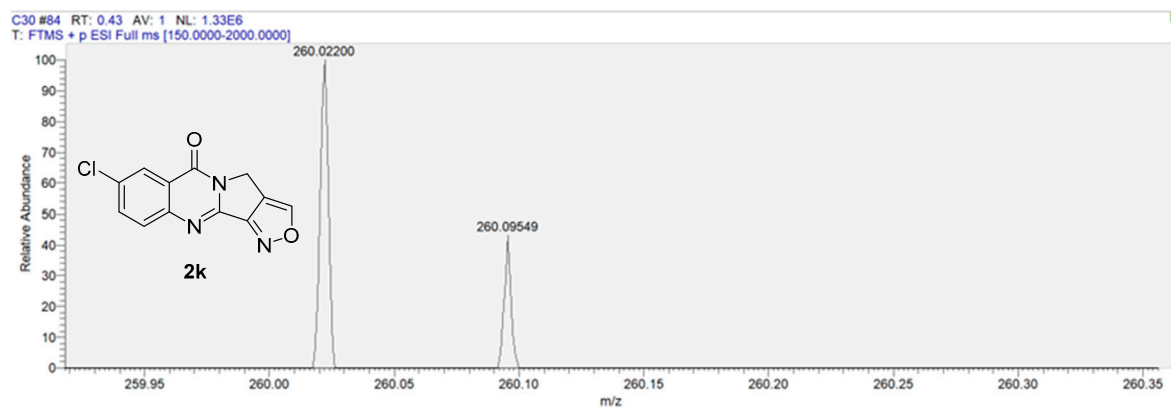

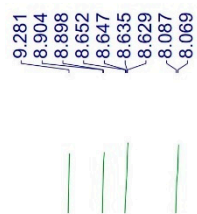

$^1\text{H}$  NMR, 500MHz,  $\text{DMSO}-d_6$

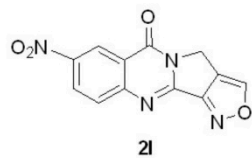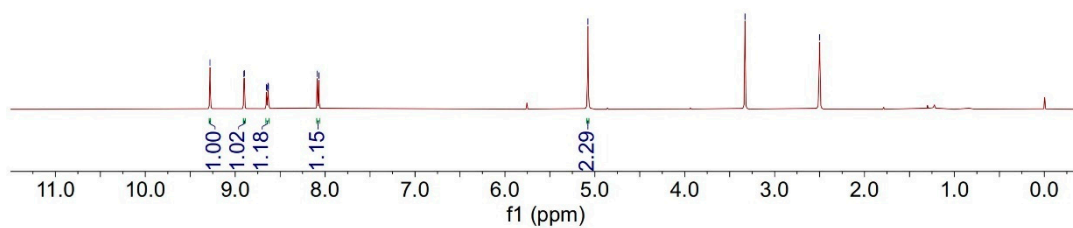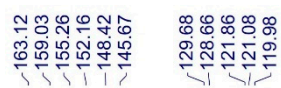

$^{13}\text{C}$  NMR, 126MHz,  $\text{DMSO}-d_6$

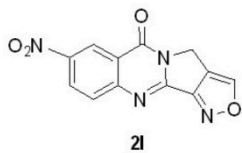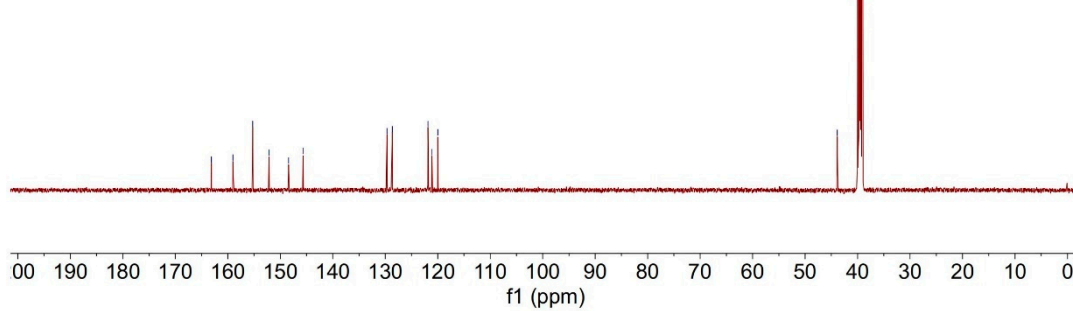

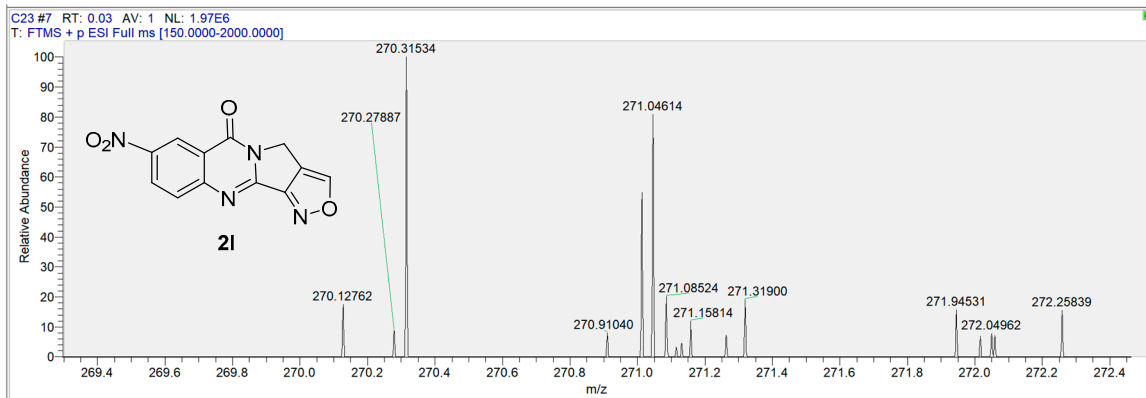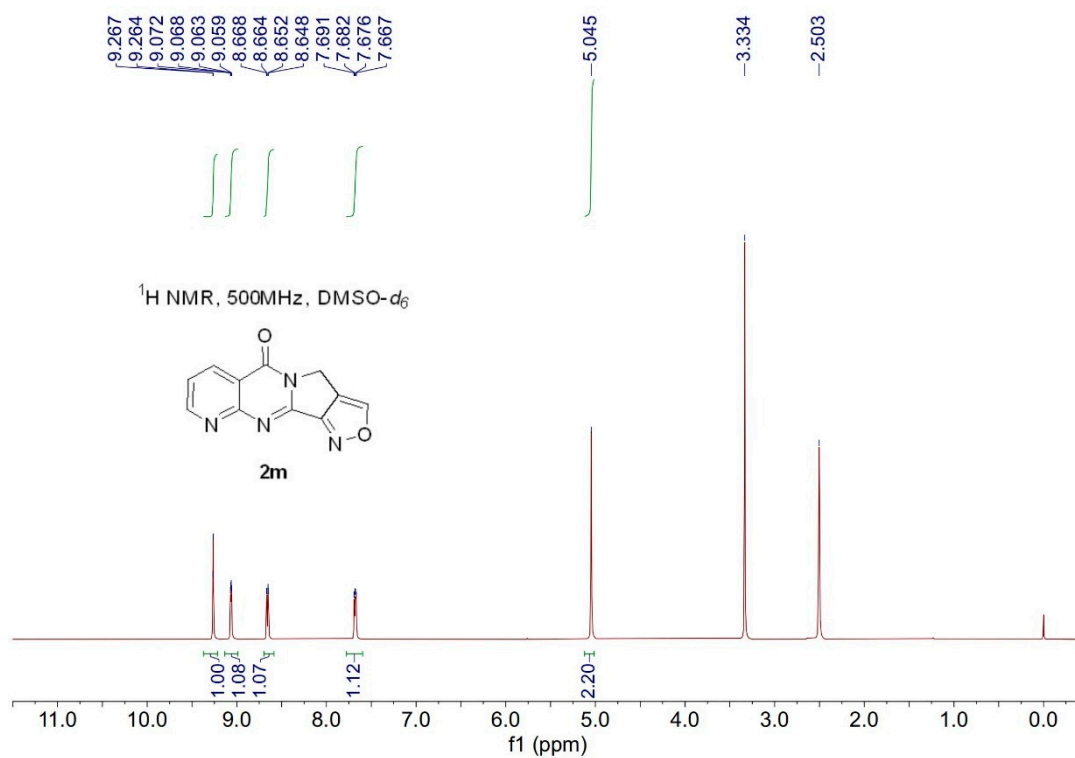



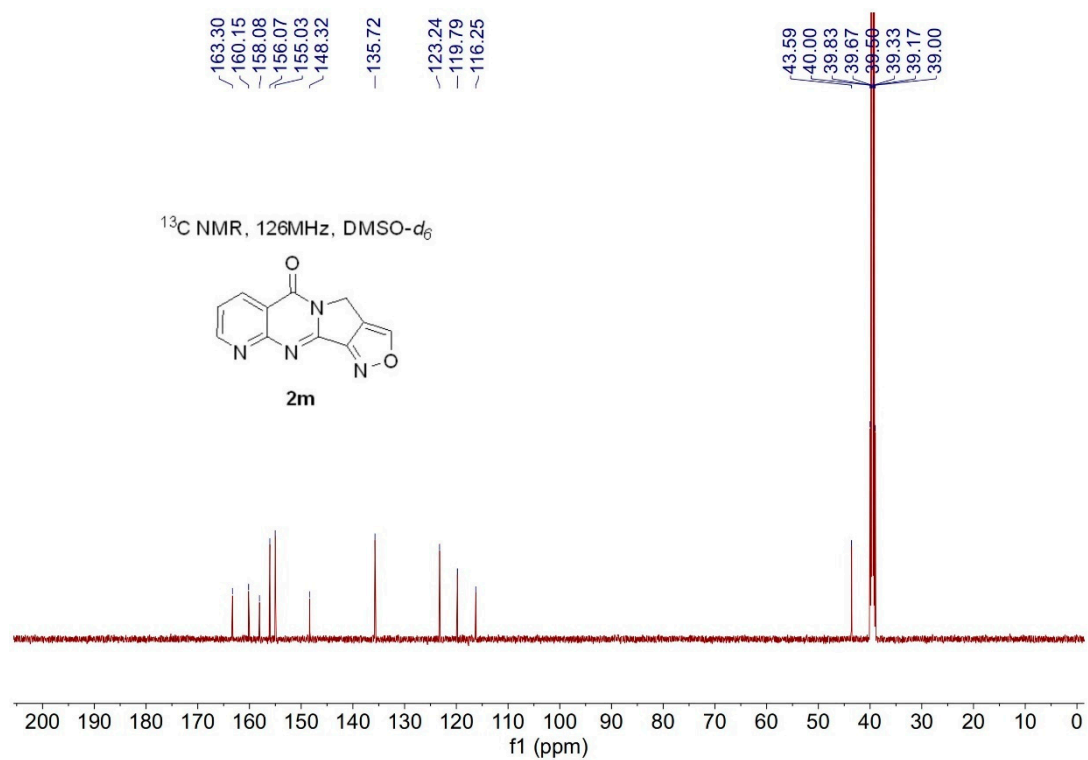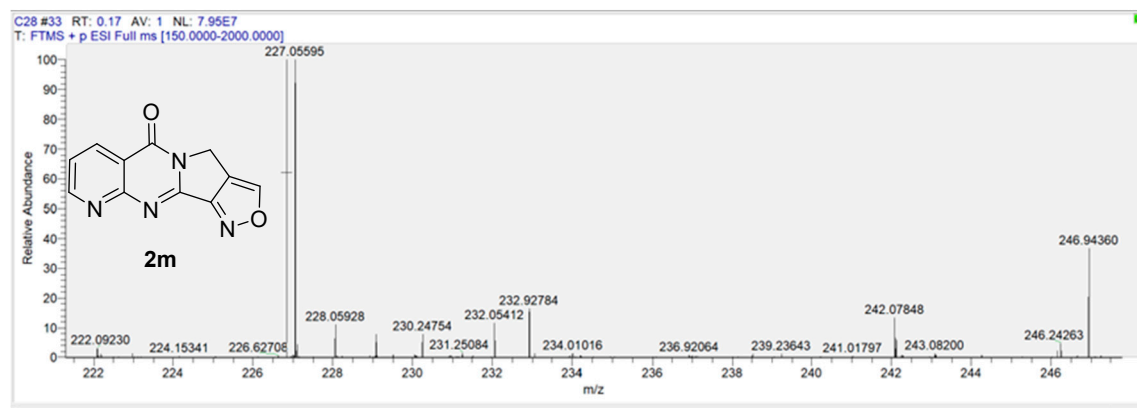

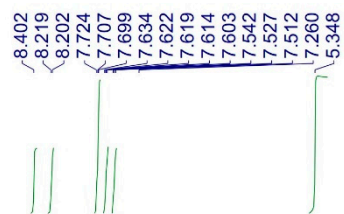

$^1\text{H}$  NMR, 500 MHz,  $\text{CDCl}_3$

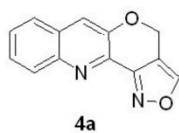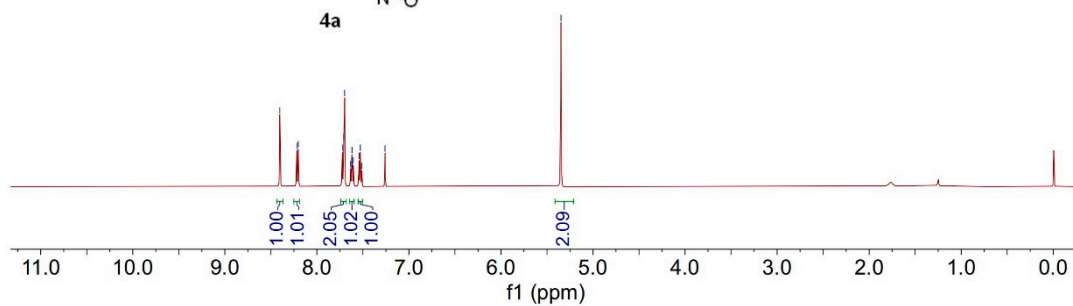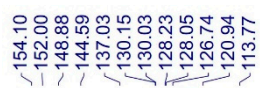

$^{13}\text{C}$  NMR, 126MHz,  $\text{CDCl}_3$

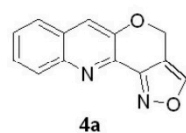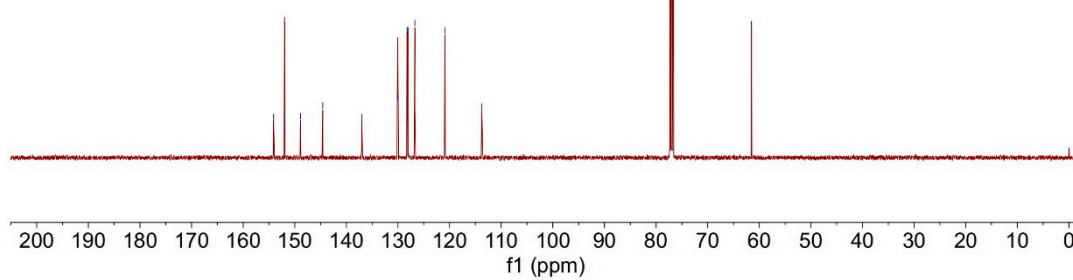

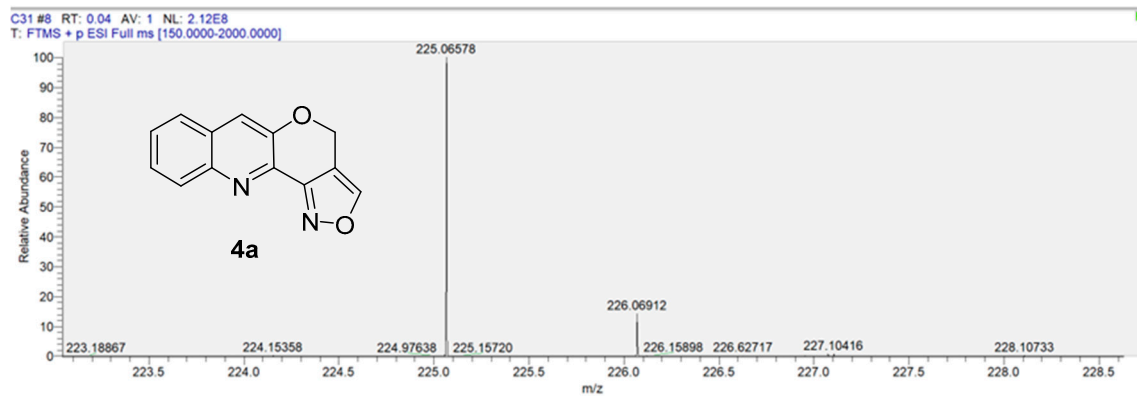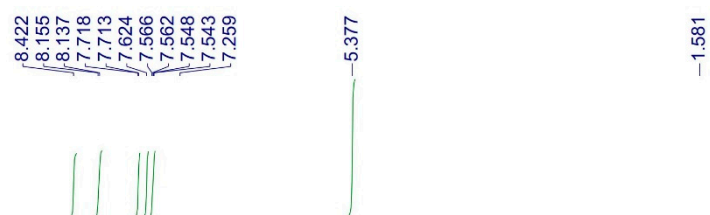

<sup>1</sup>H NMR, 500 MHz, CDCl<sub>3</sub>

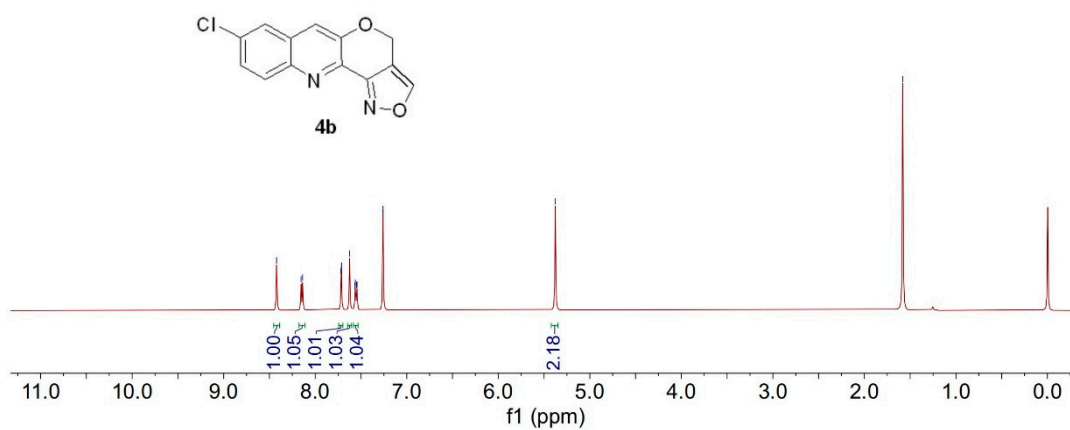

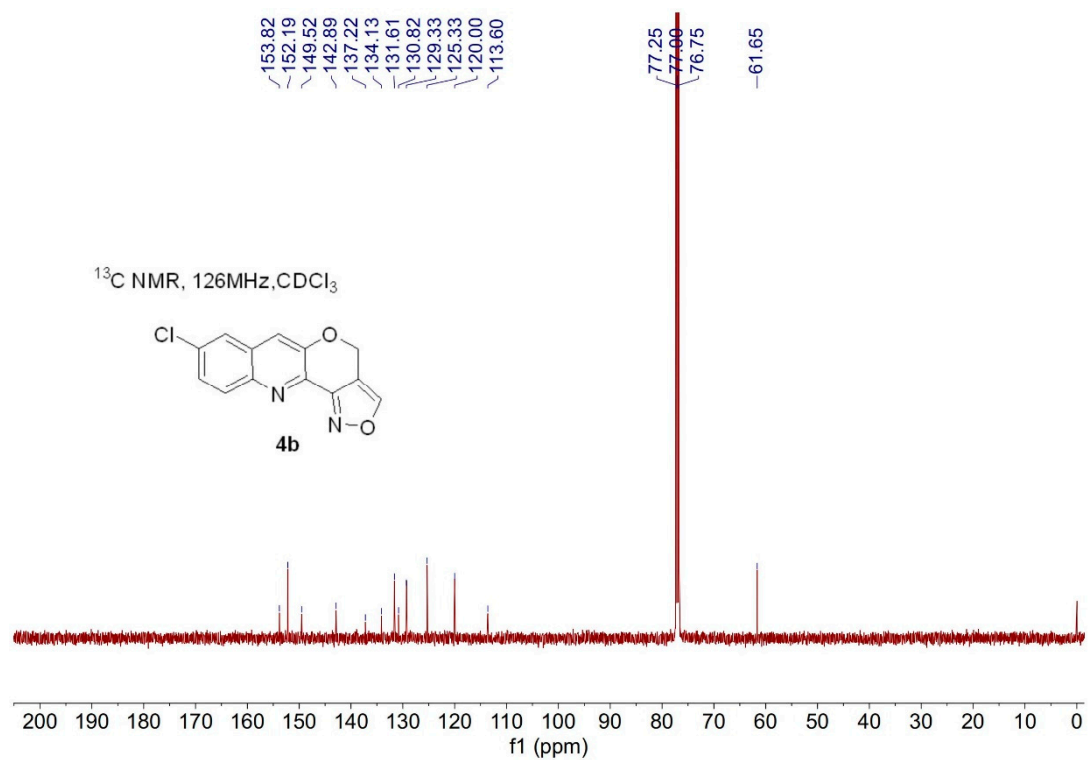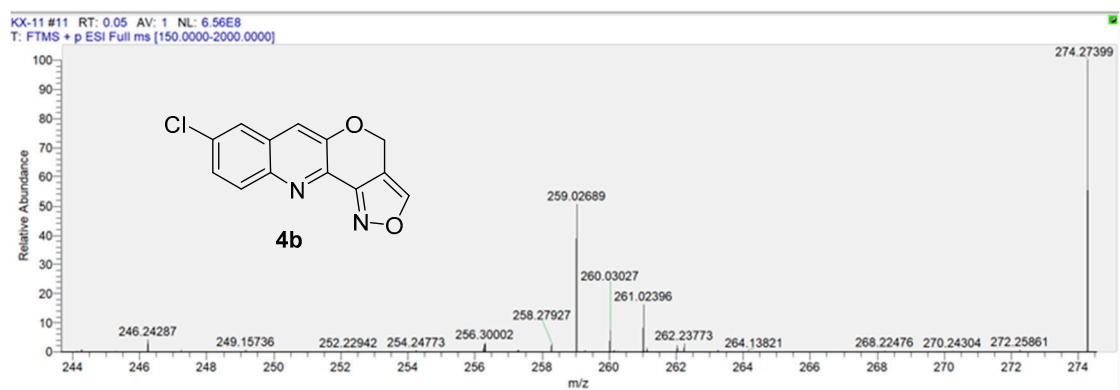

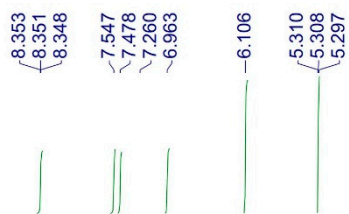

$^1\text{H}$  NMR, 500 MHz,  $\text{CDCl}_3$

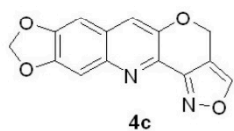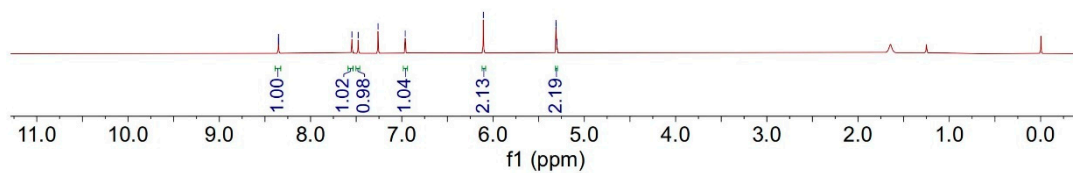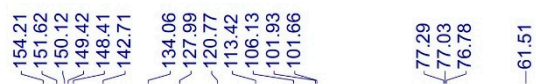

$^{13}\text{C}$  NMR, 126MHz,  $\text{CDCl}_3$

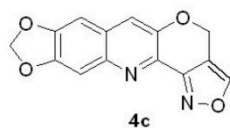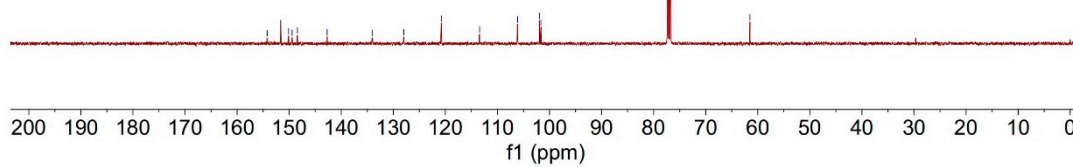

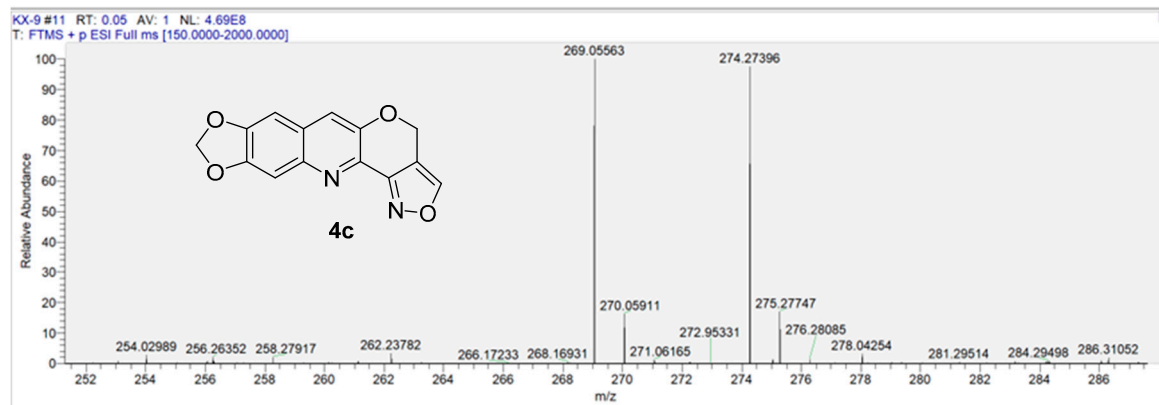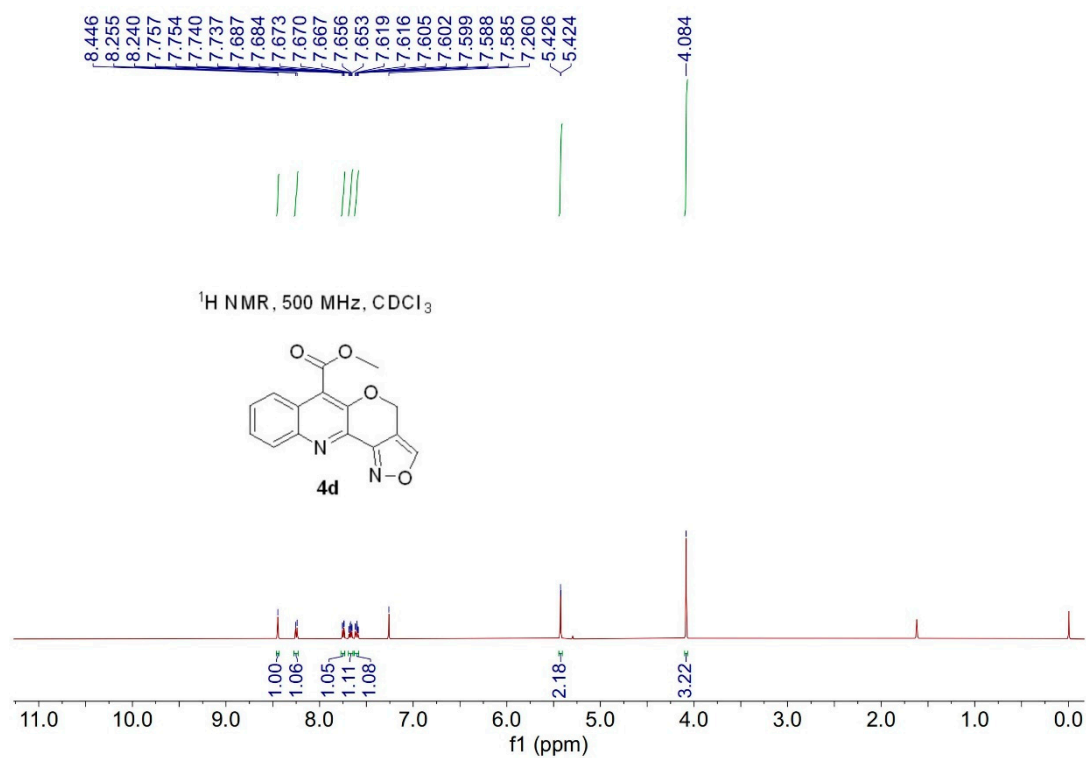

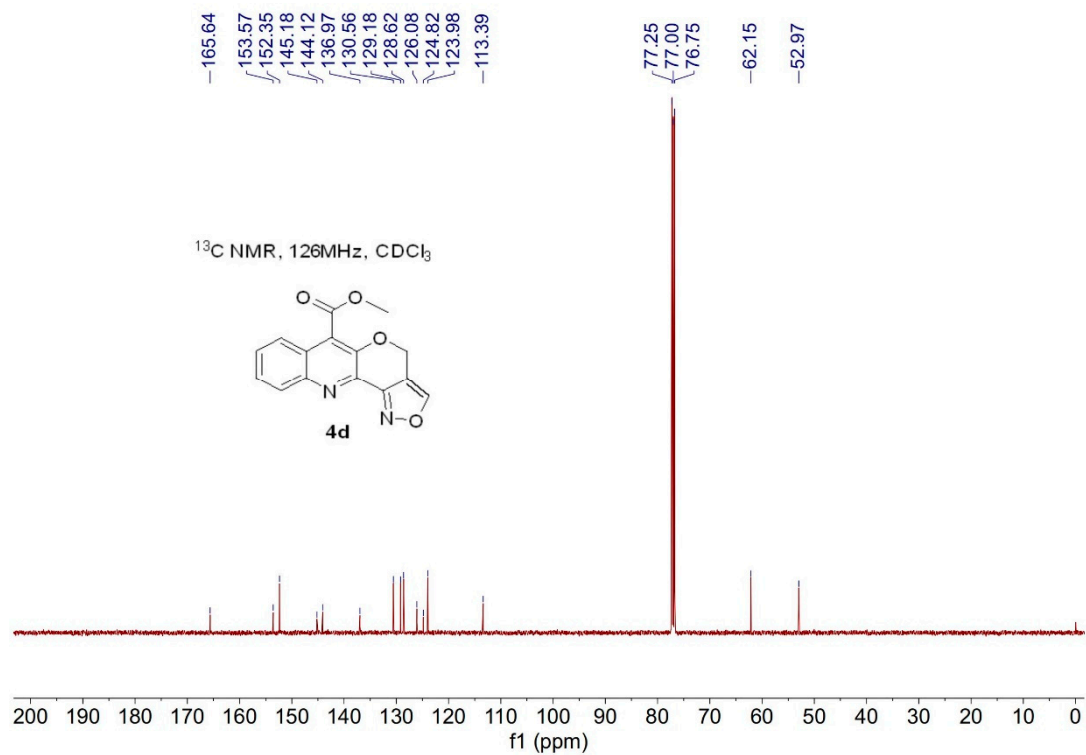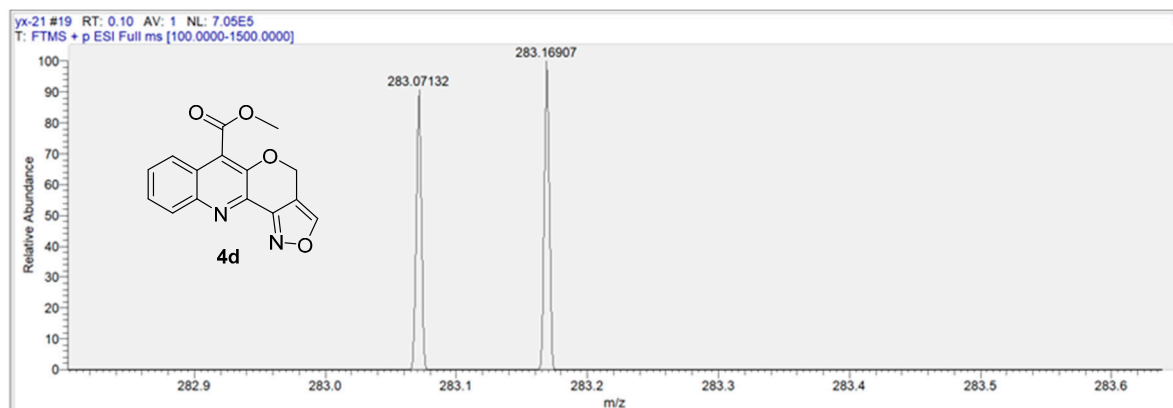

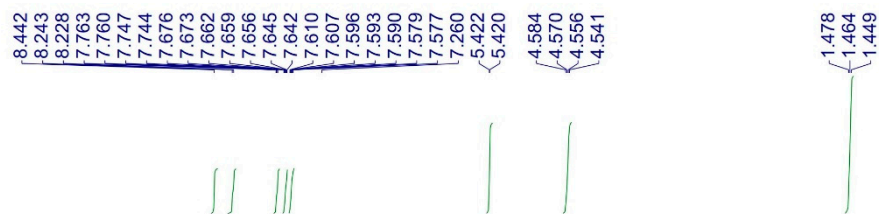

$^1\text{H}$  NMR, 500 MHz,  $\text{CDCl}_3$

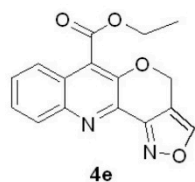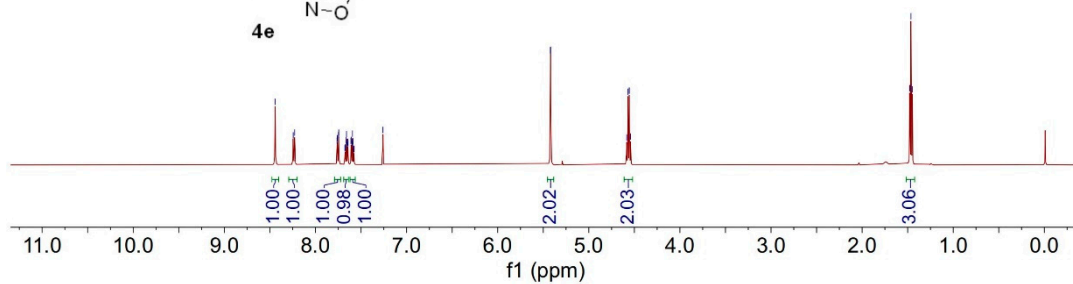

$^{13}\text{C}$  NMR, 126 MHz,  $\text{CDCl}_3$

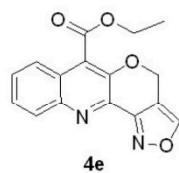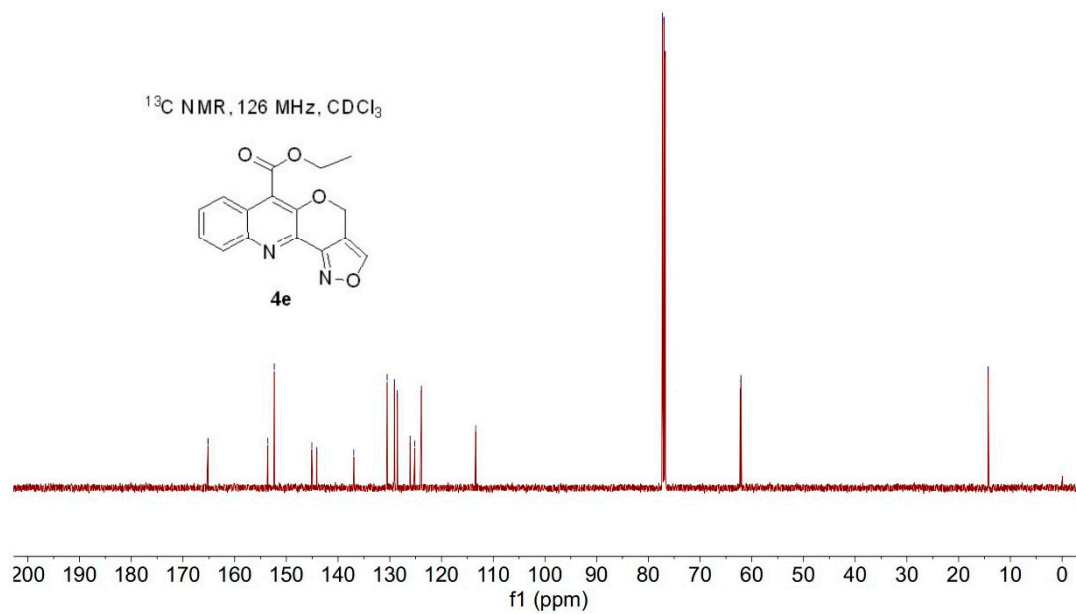



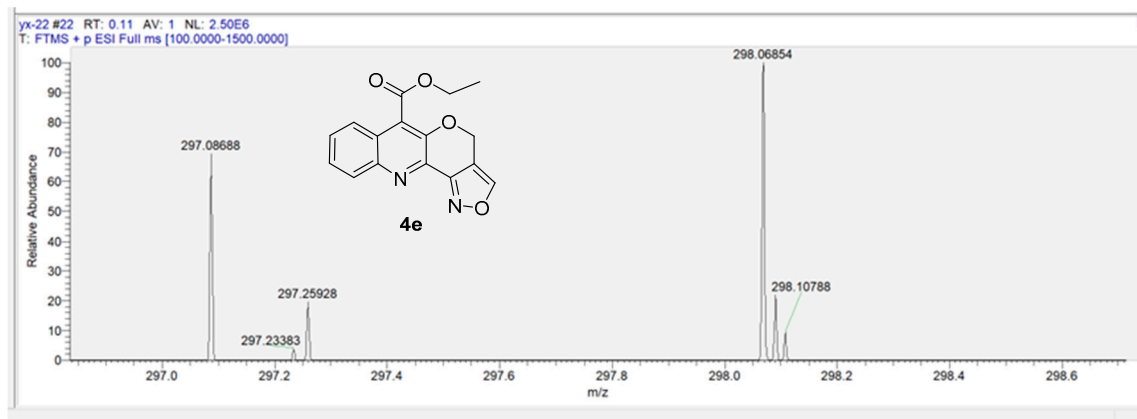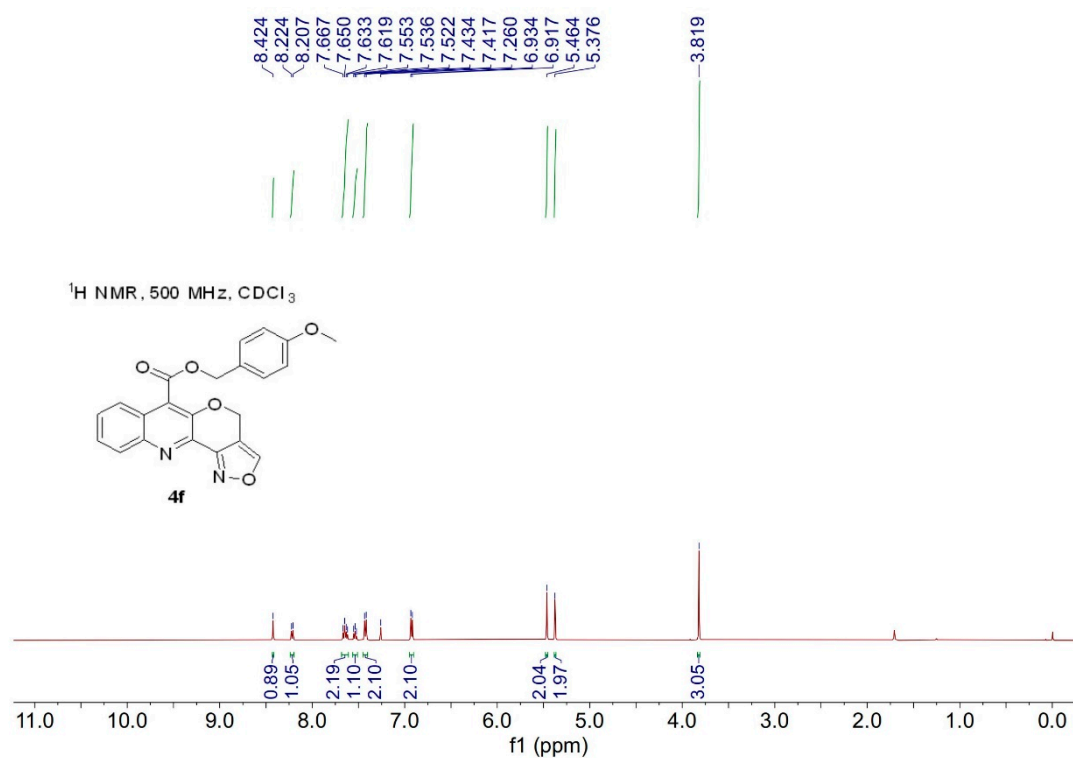

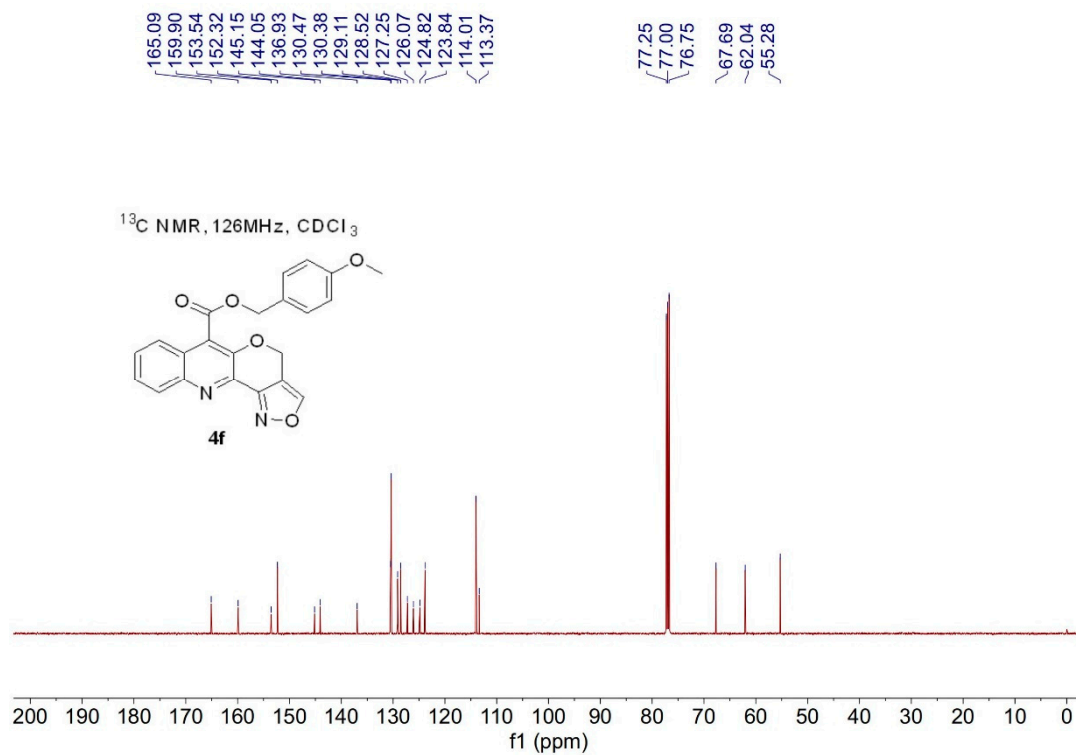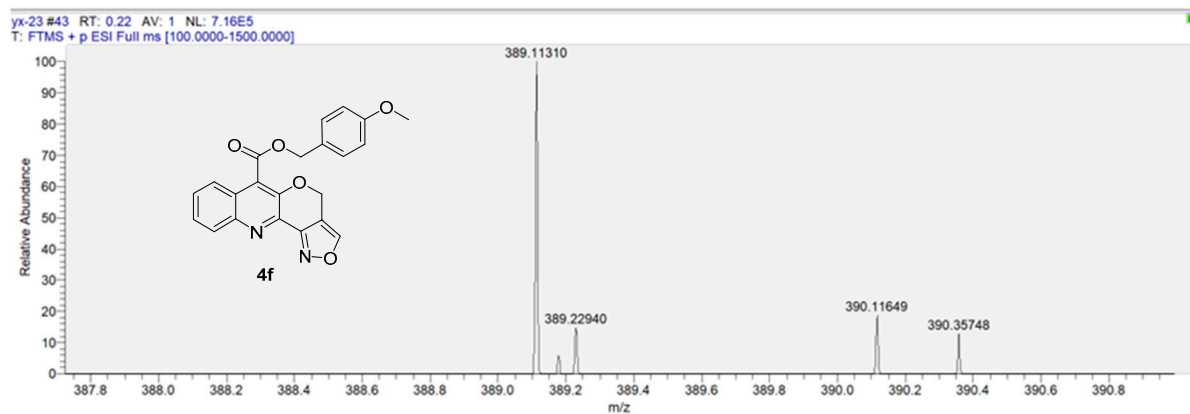

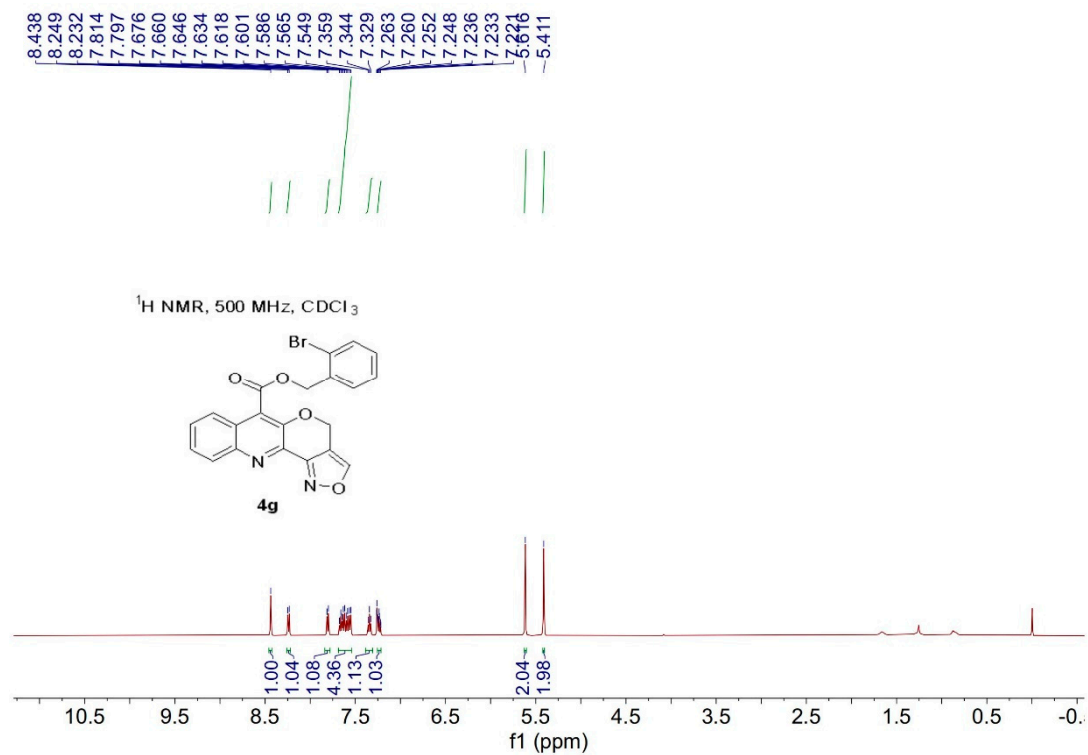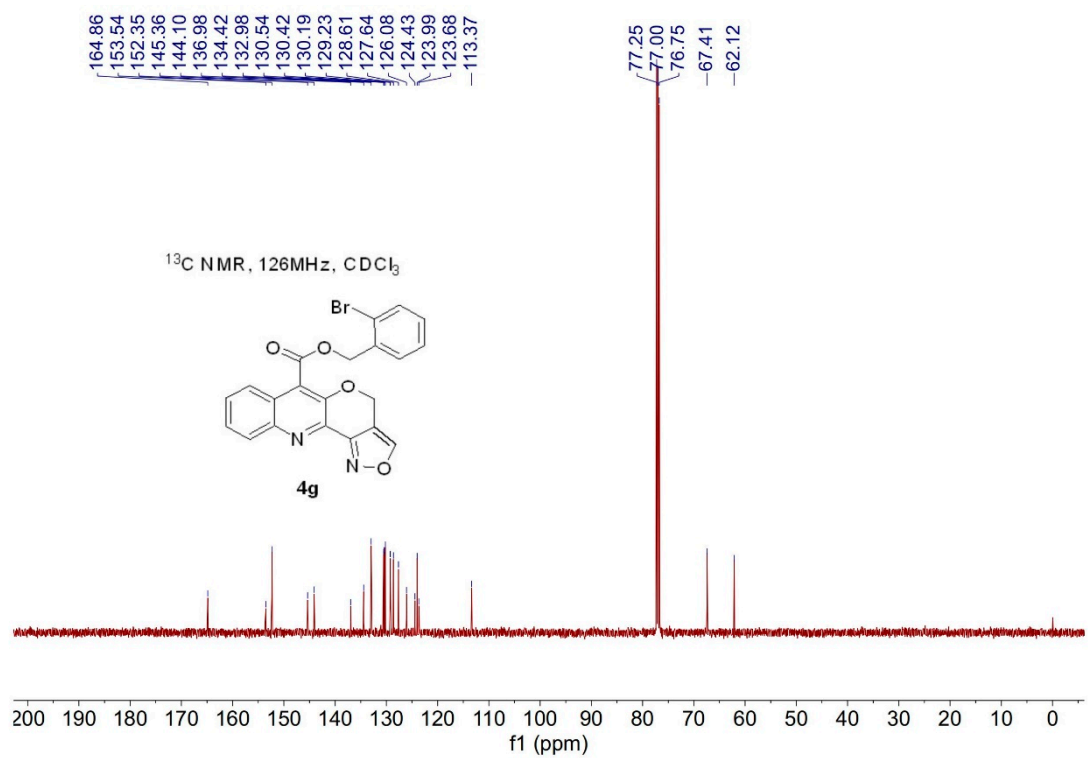

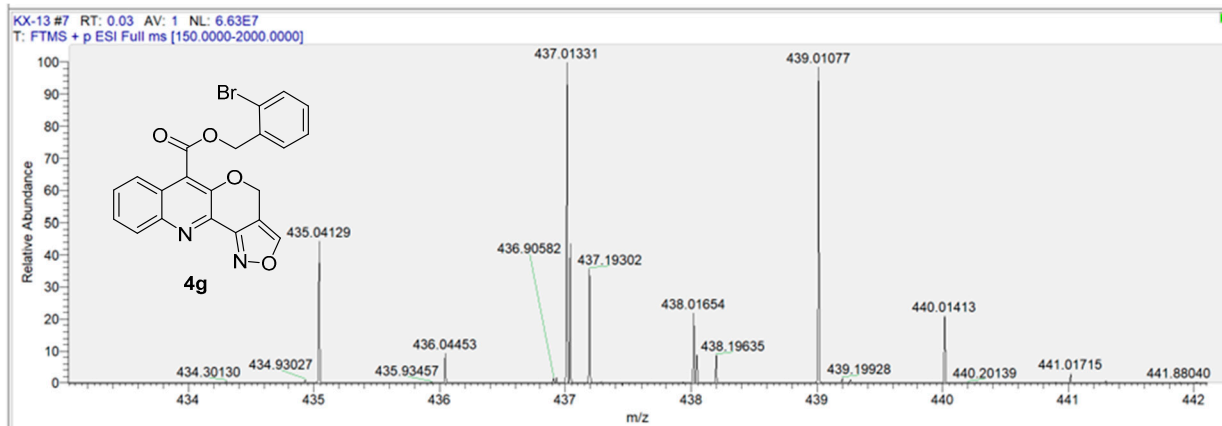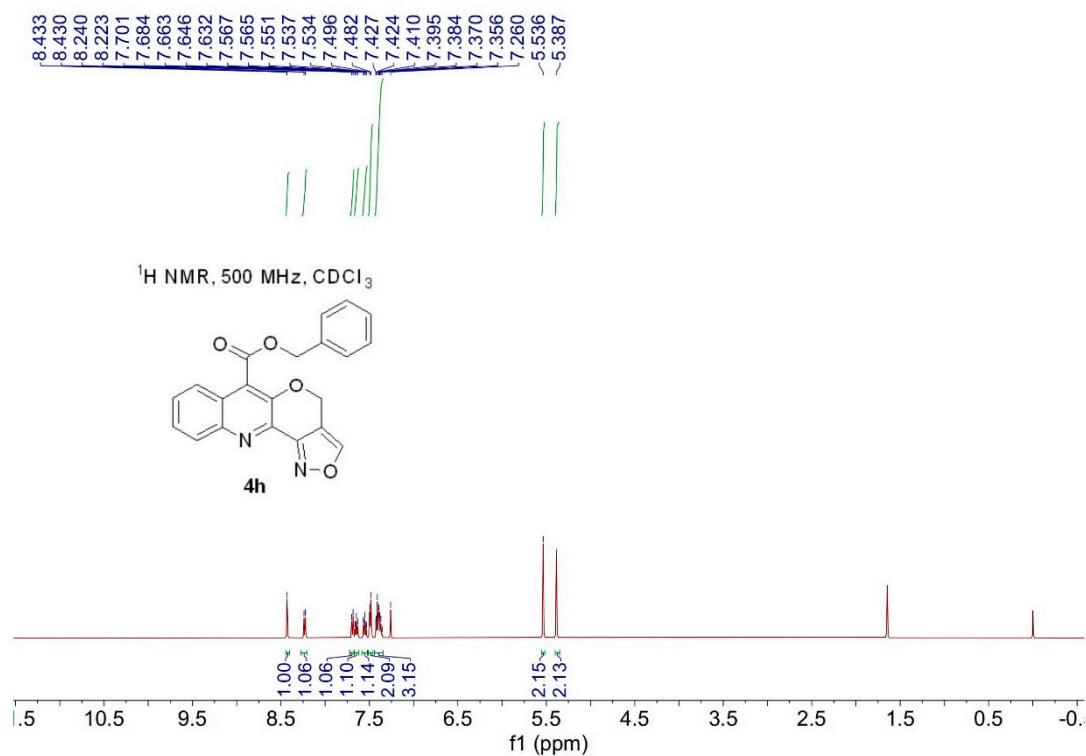

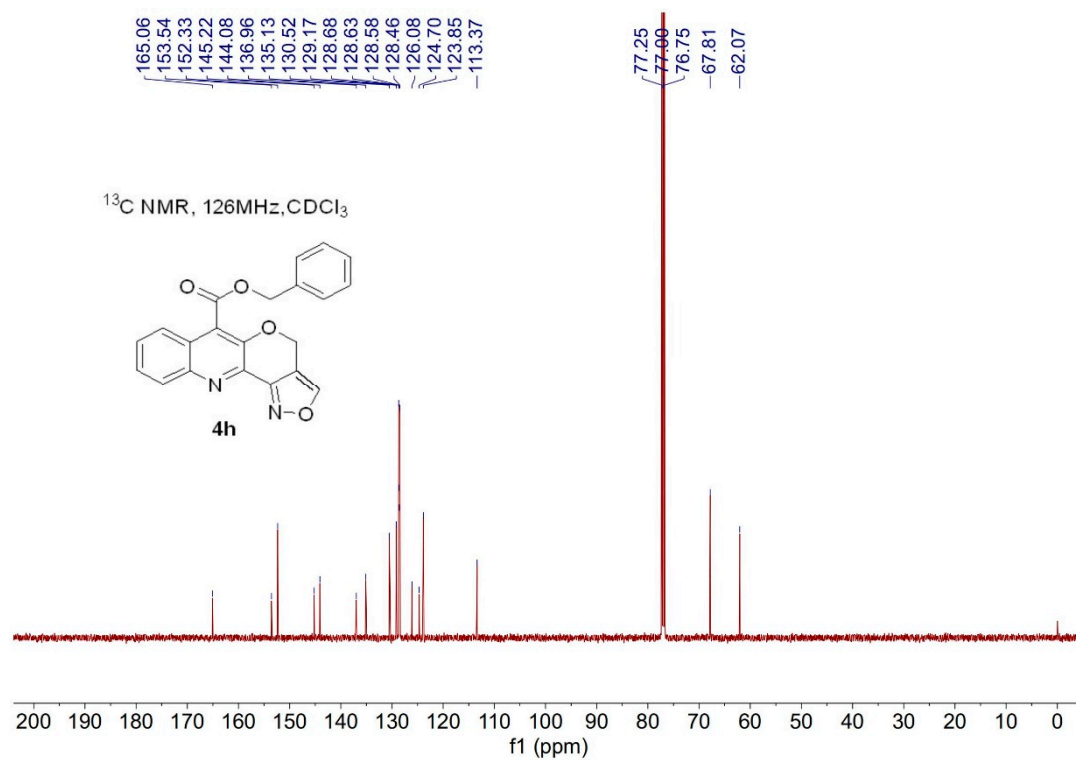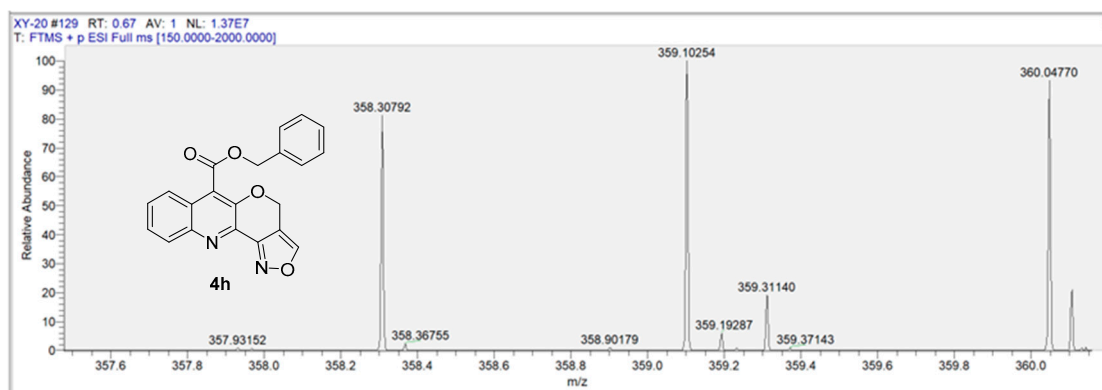

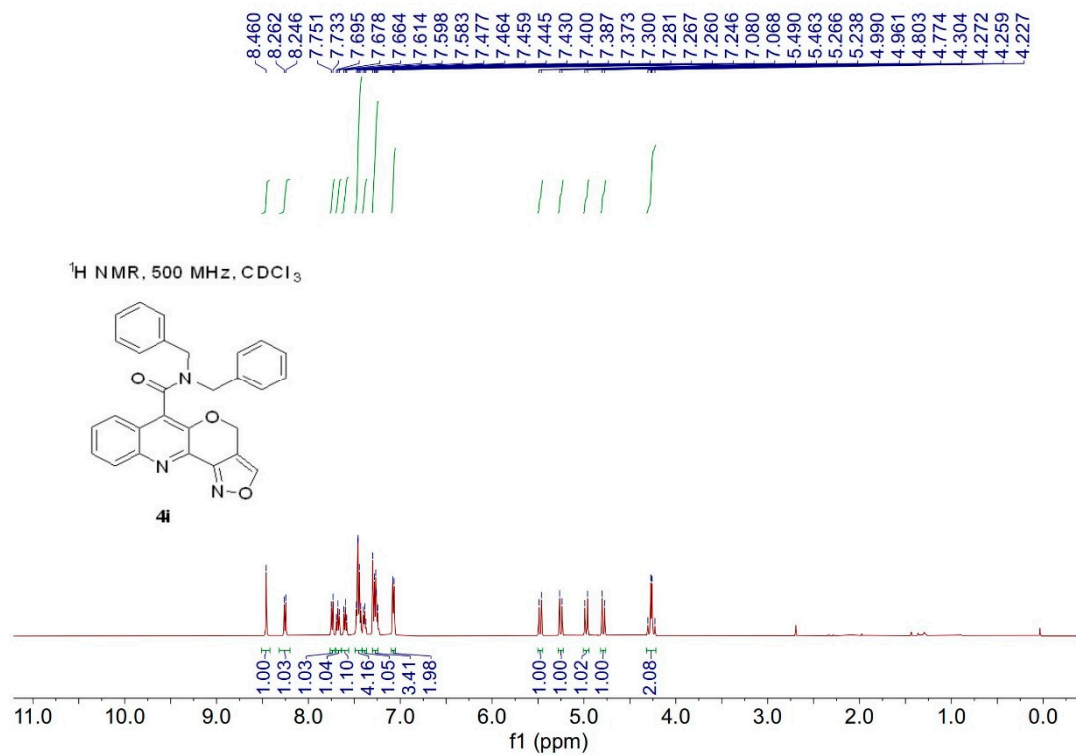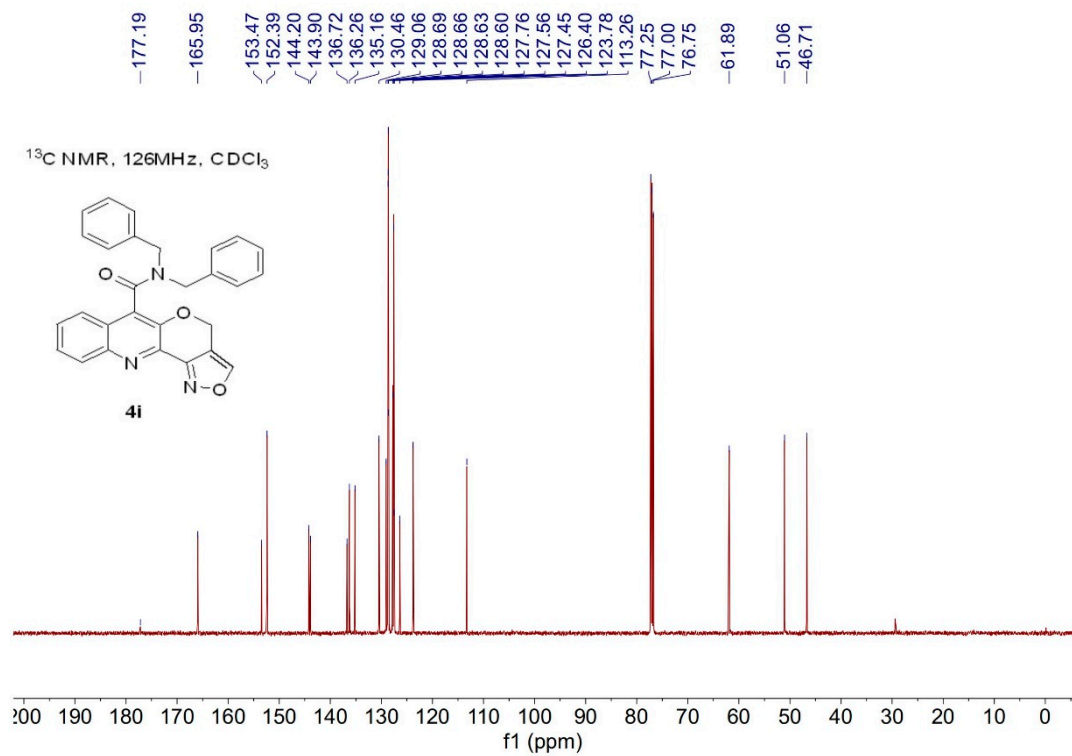

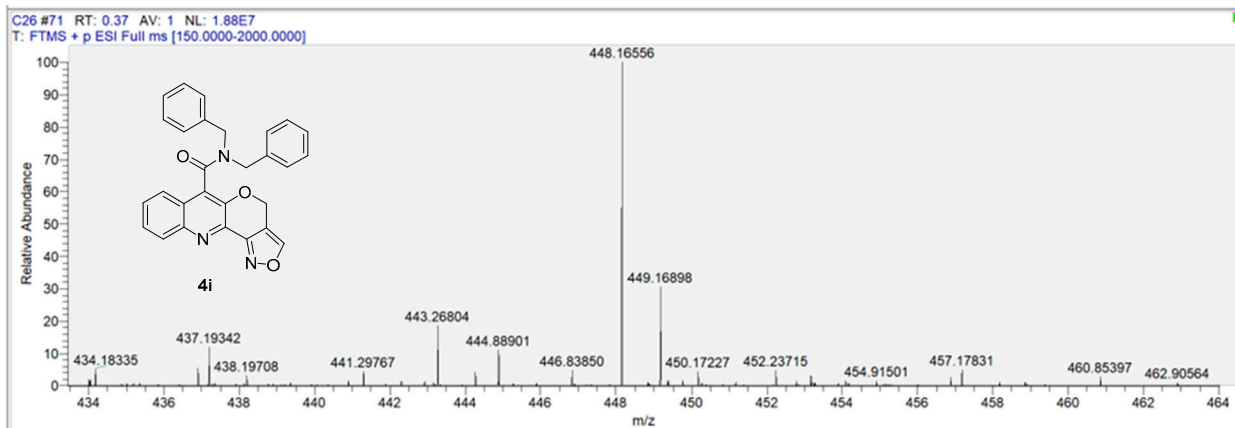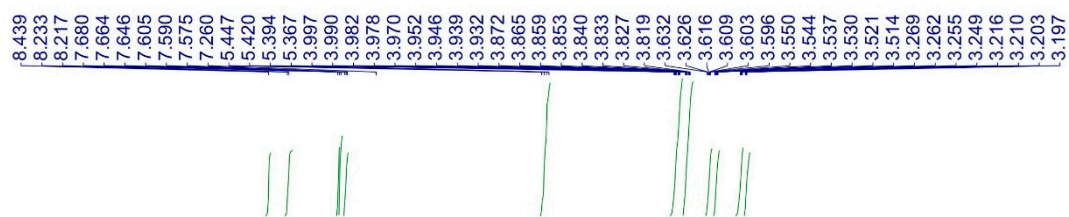

<sup>1</sup>H NMR, 500 MHz, CDCl<sub>3</sub>

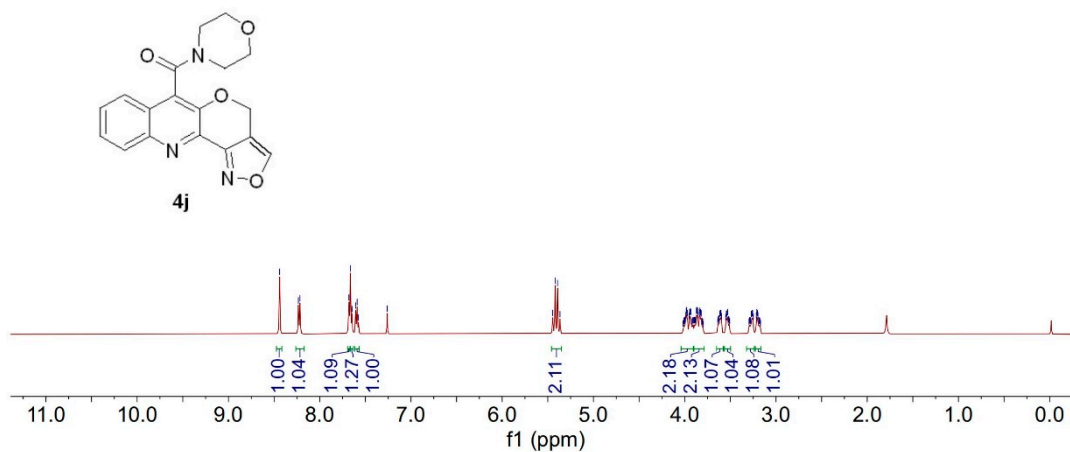

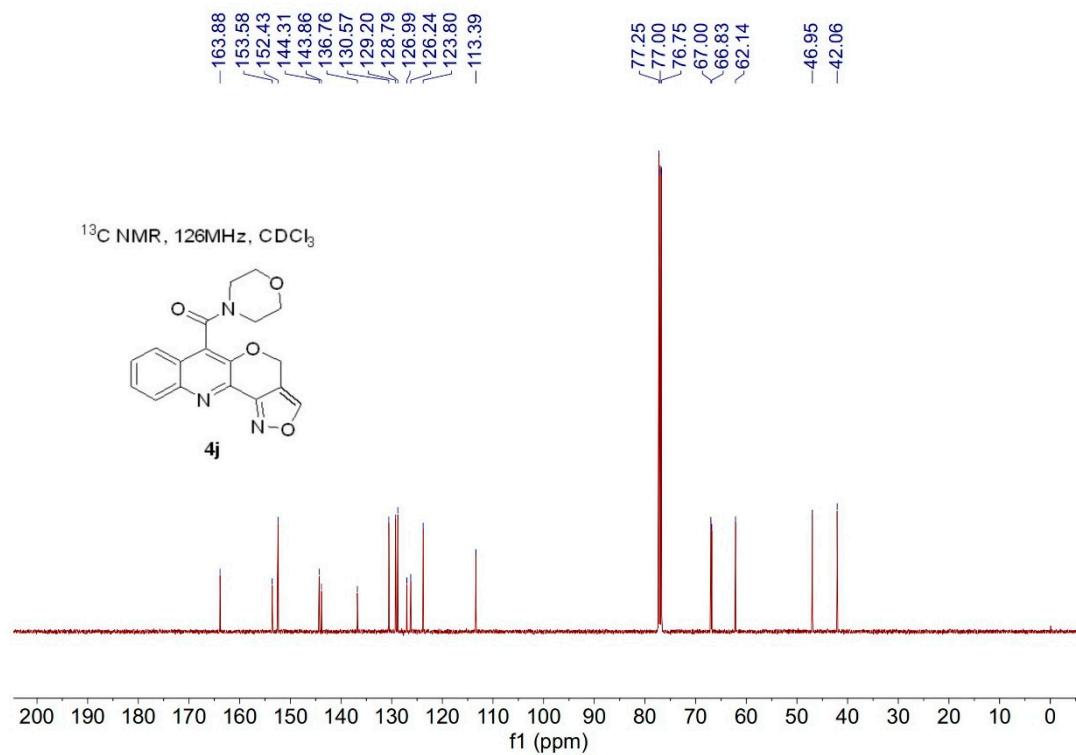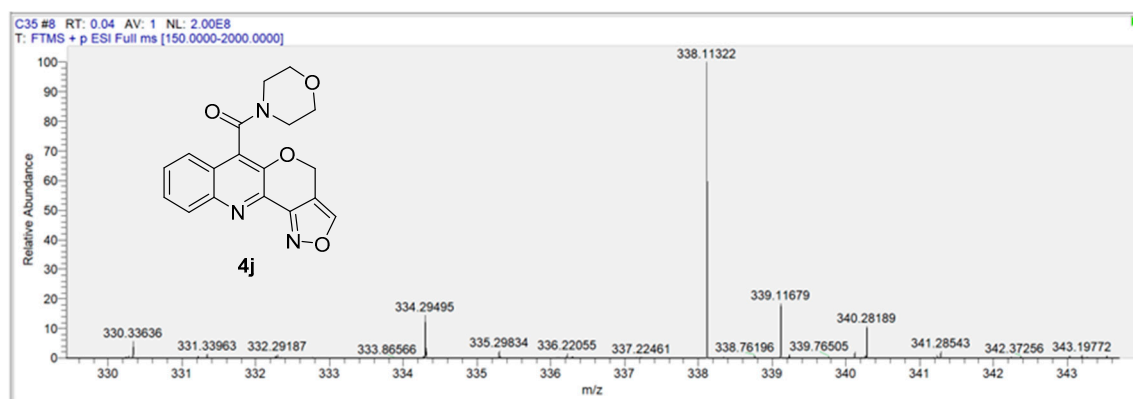



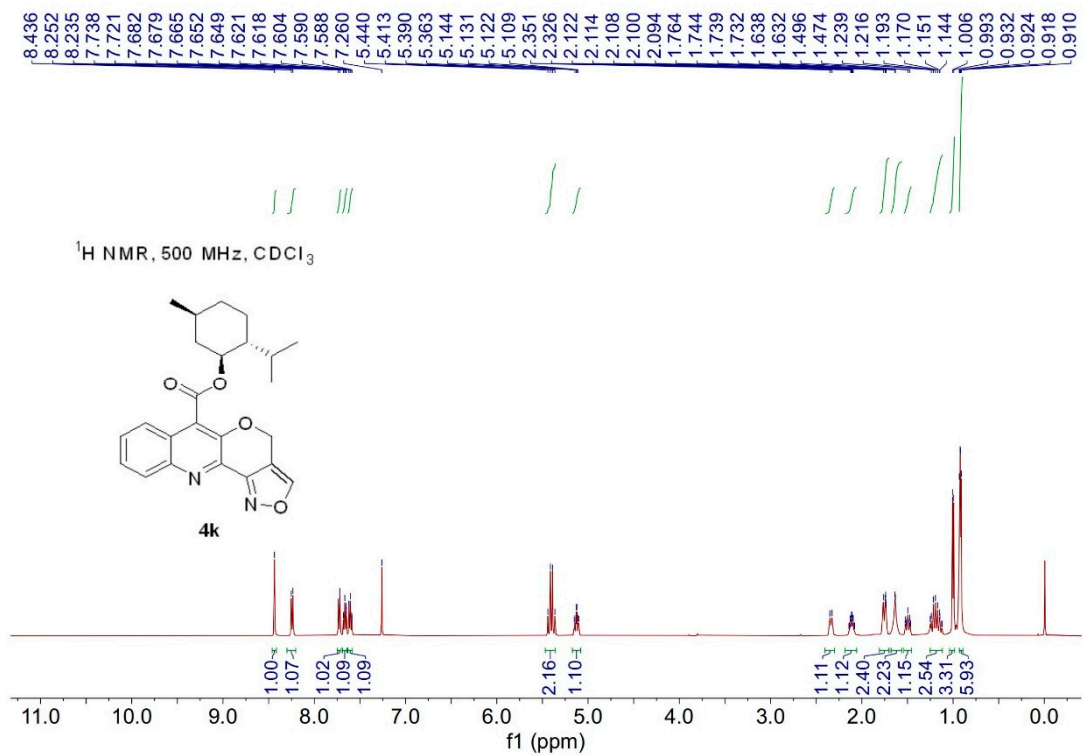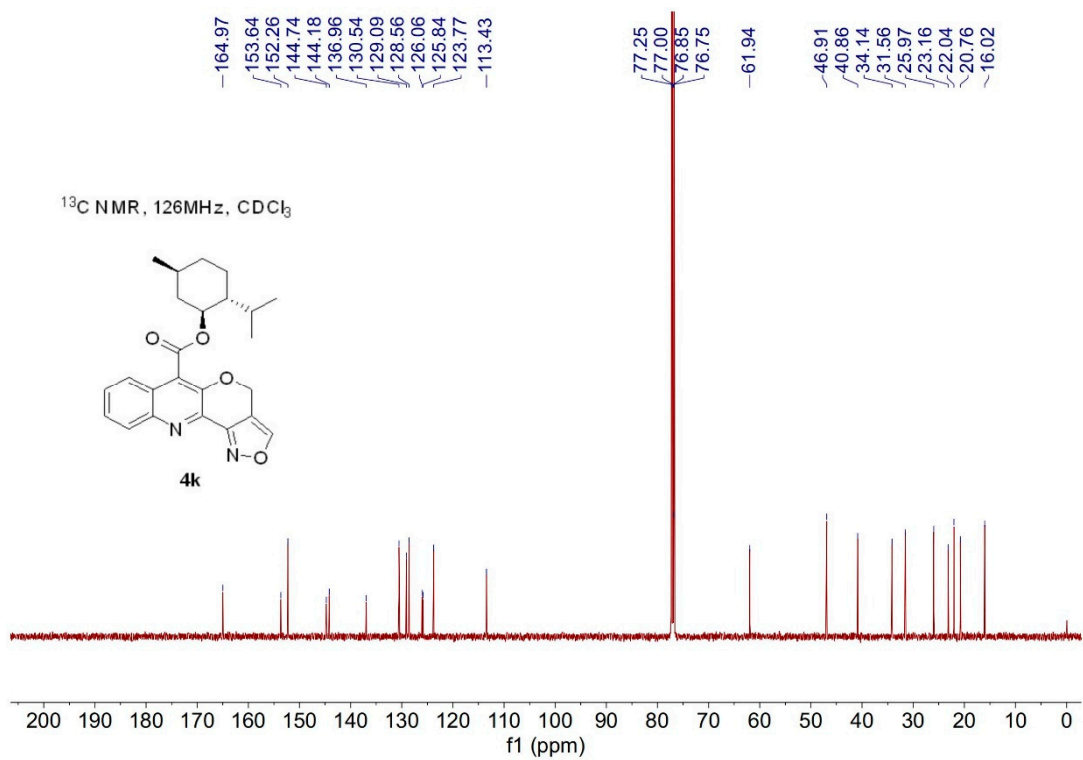

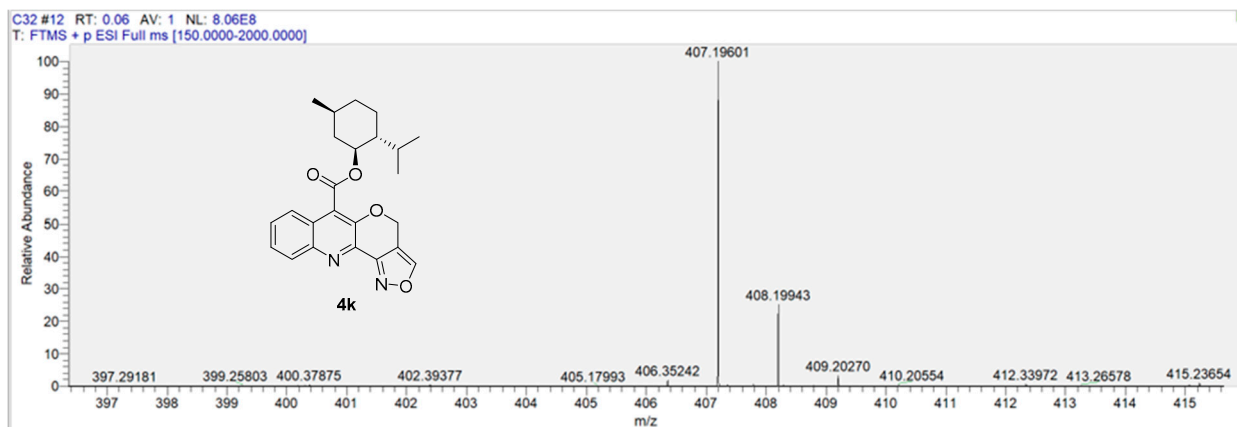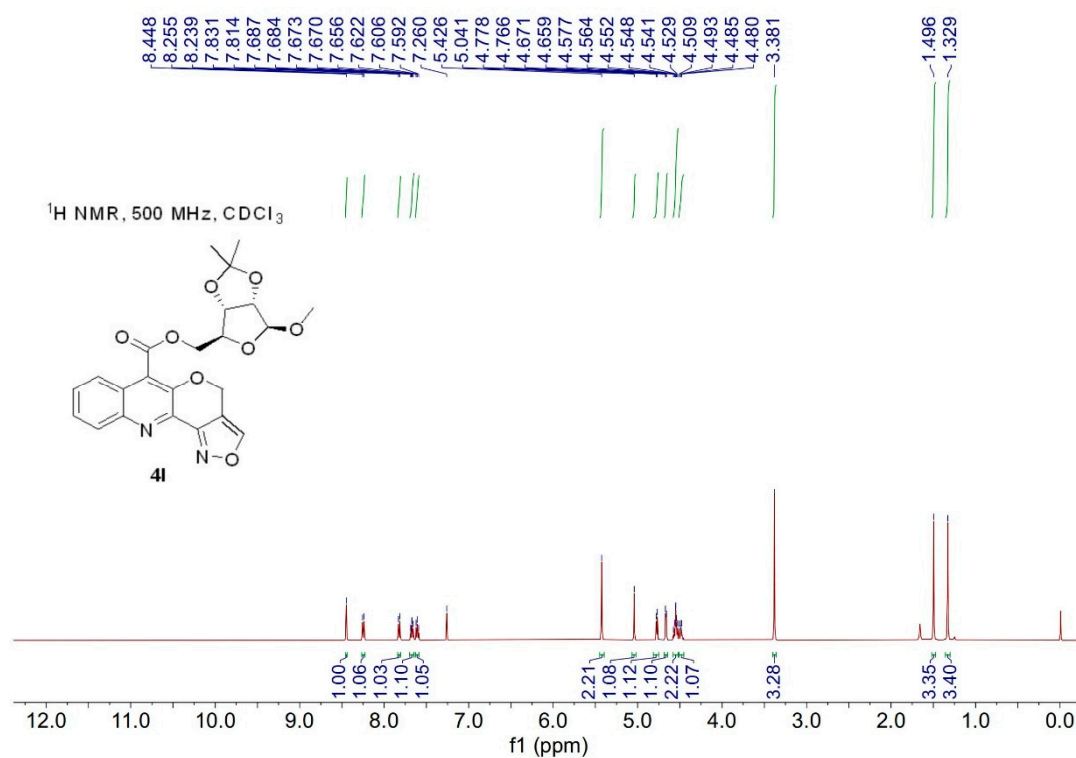

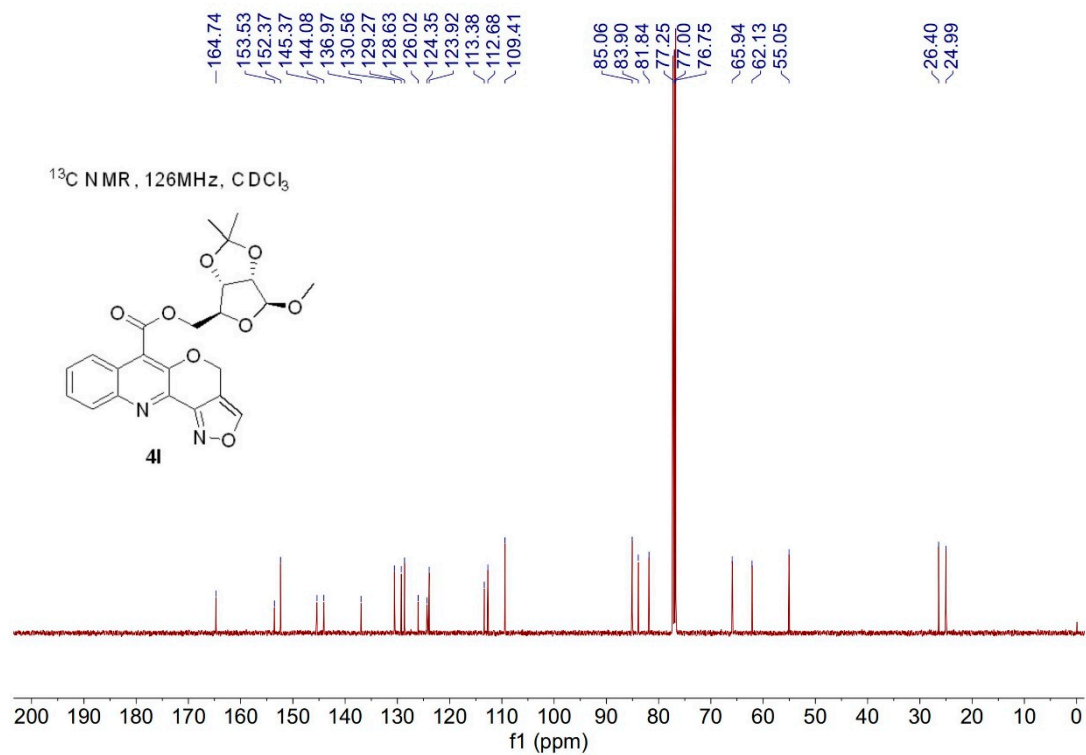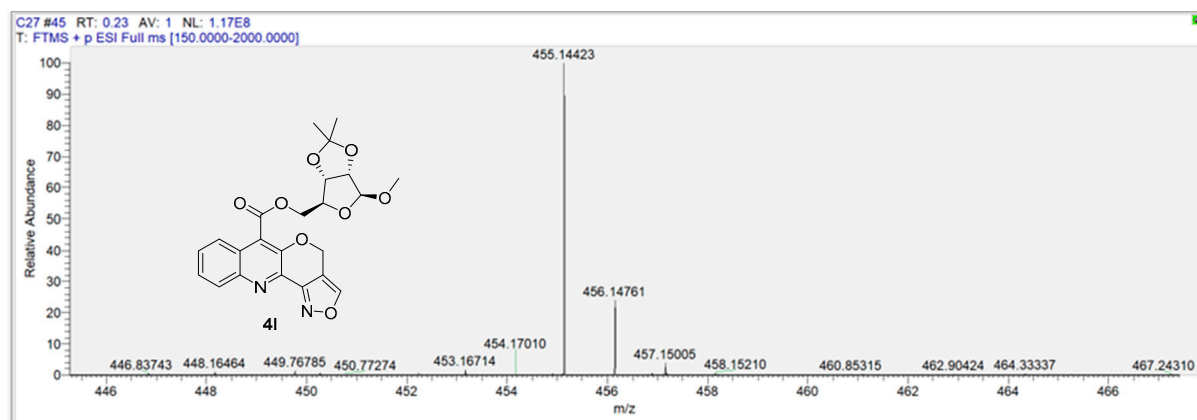

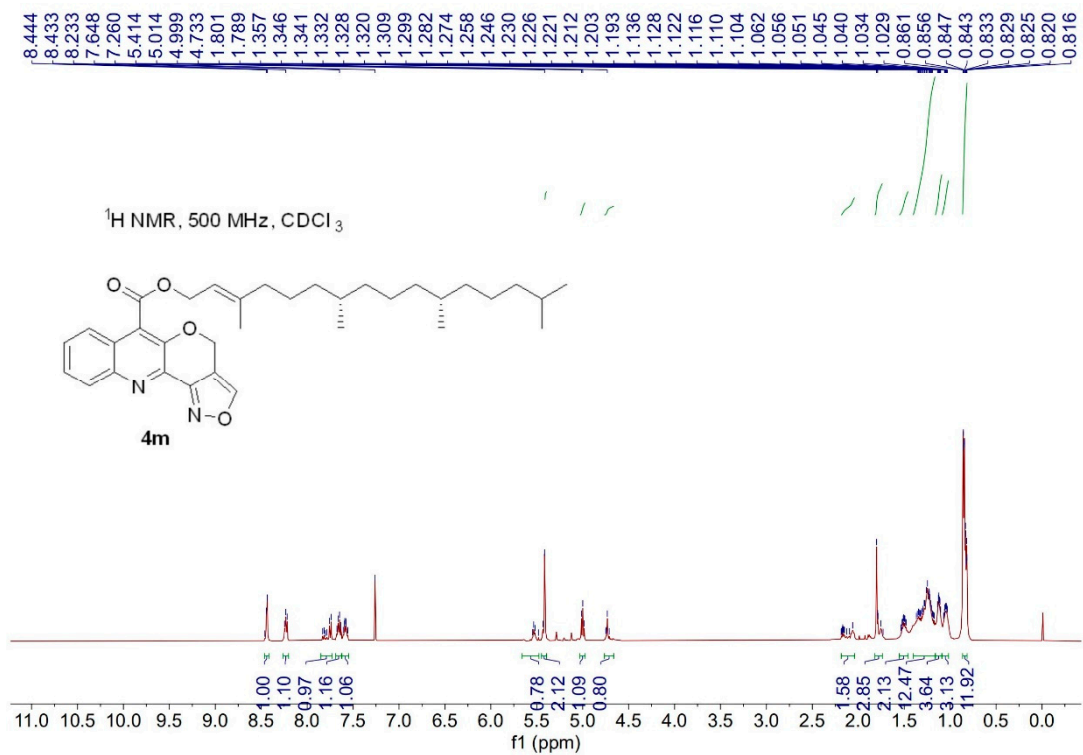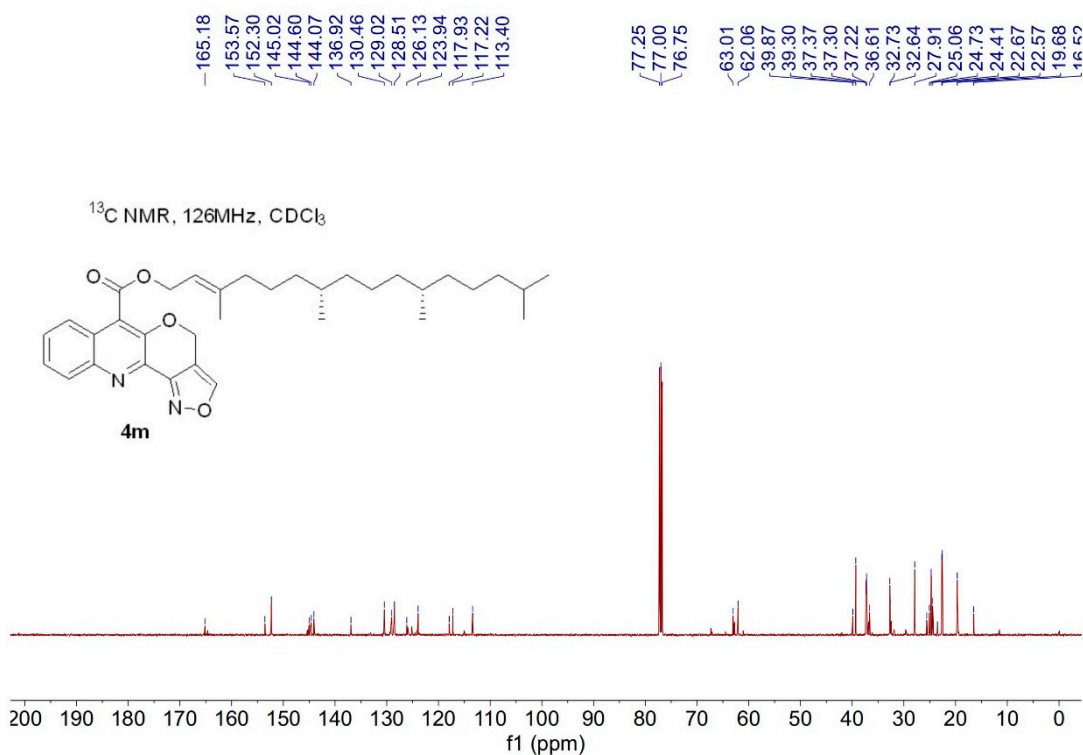

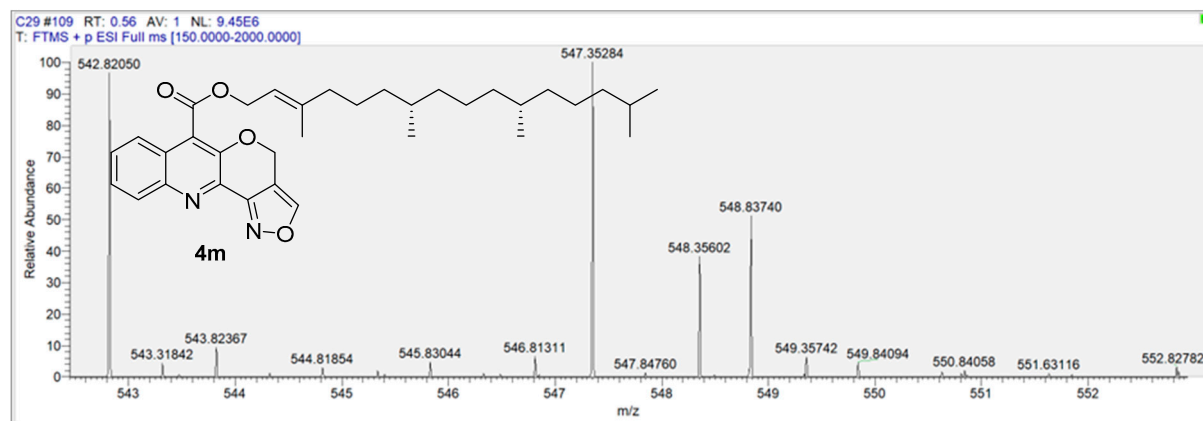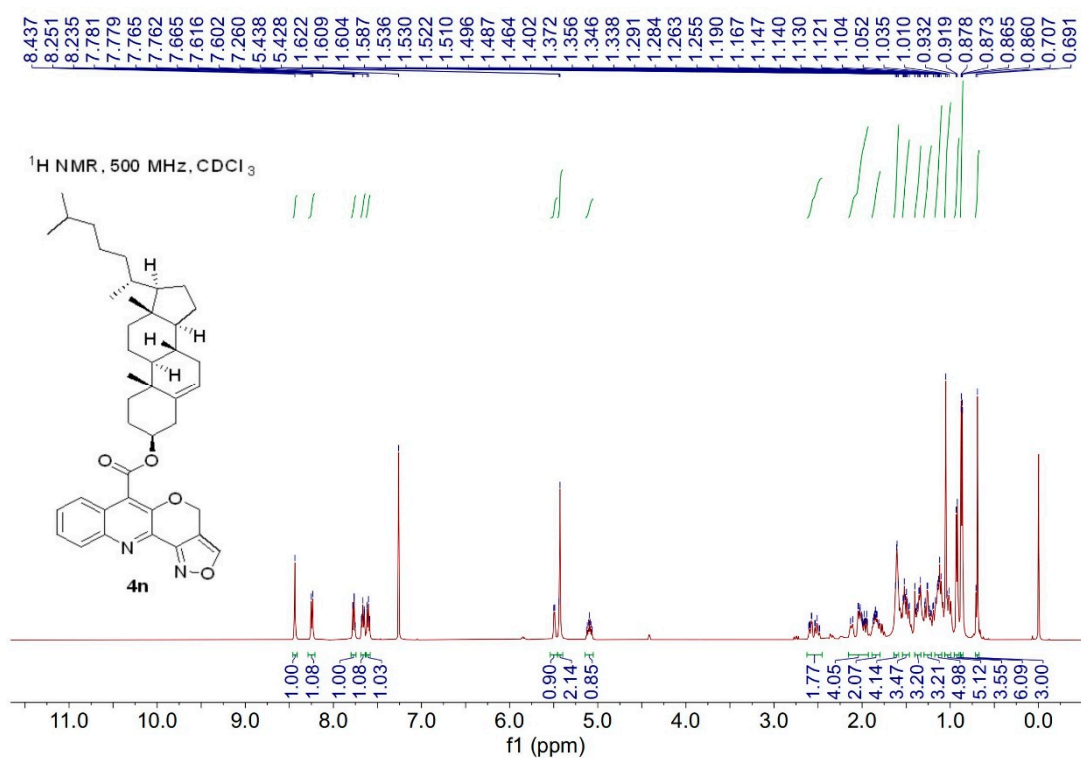

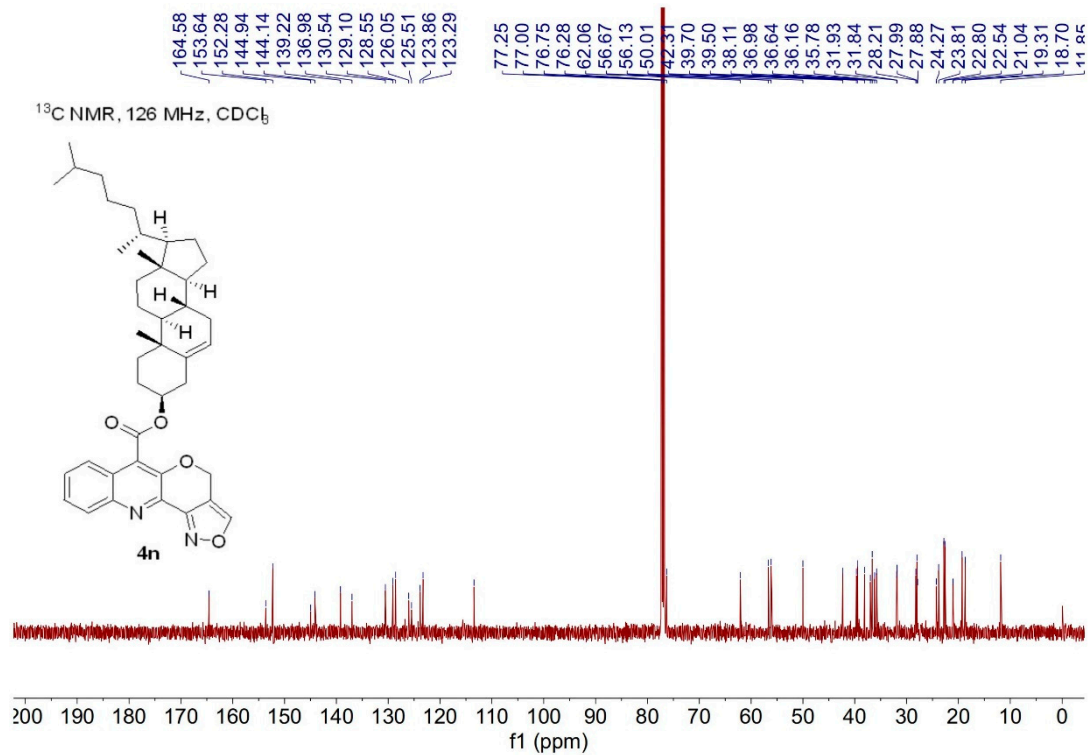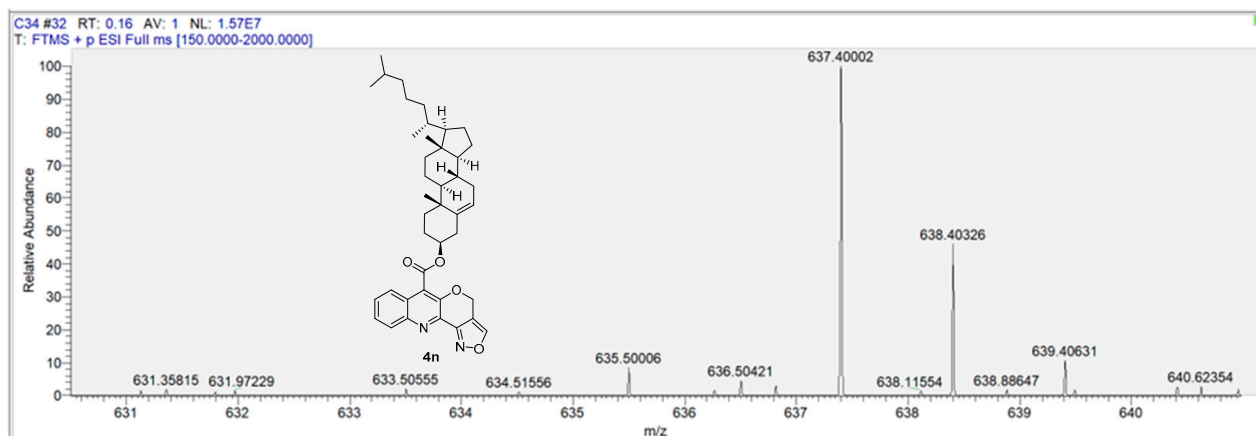

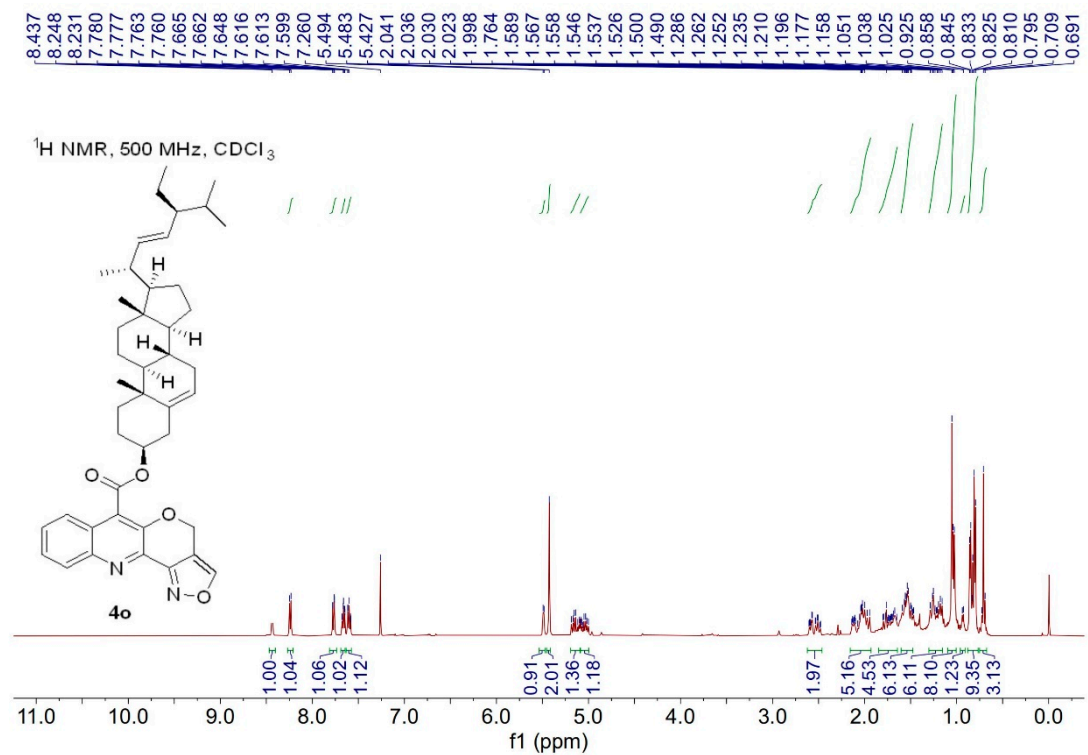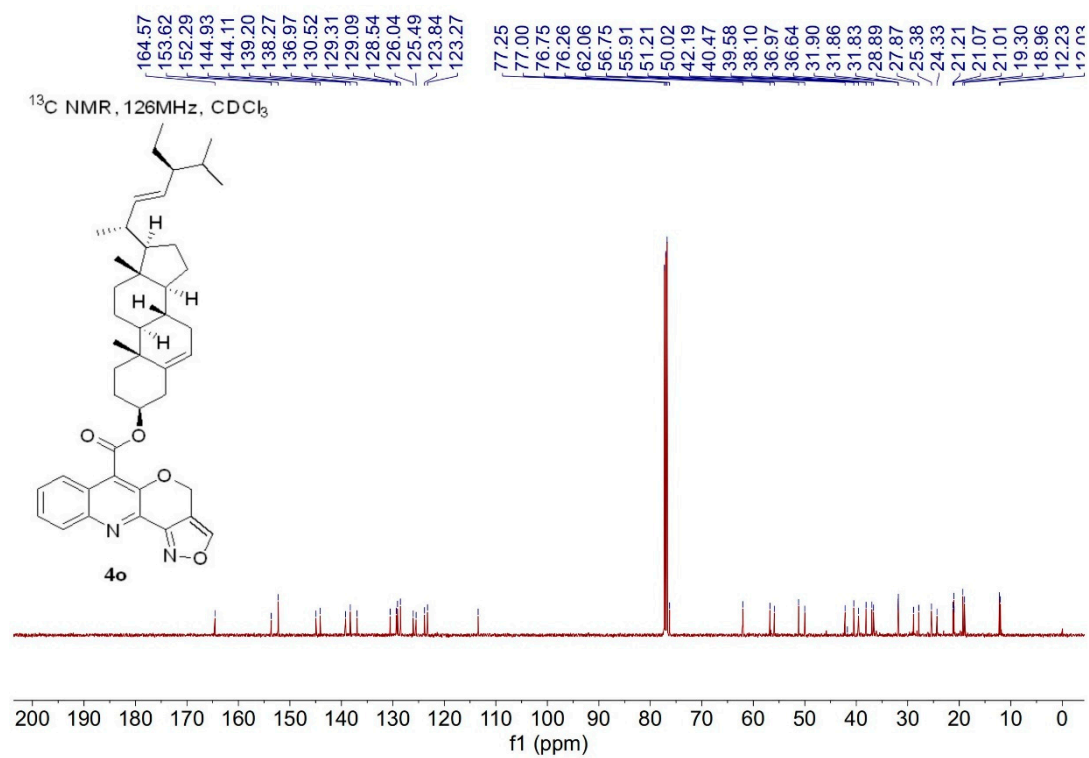







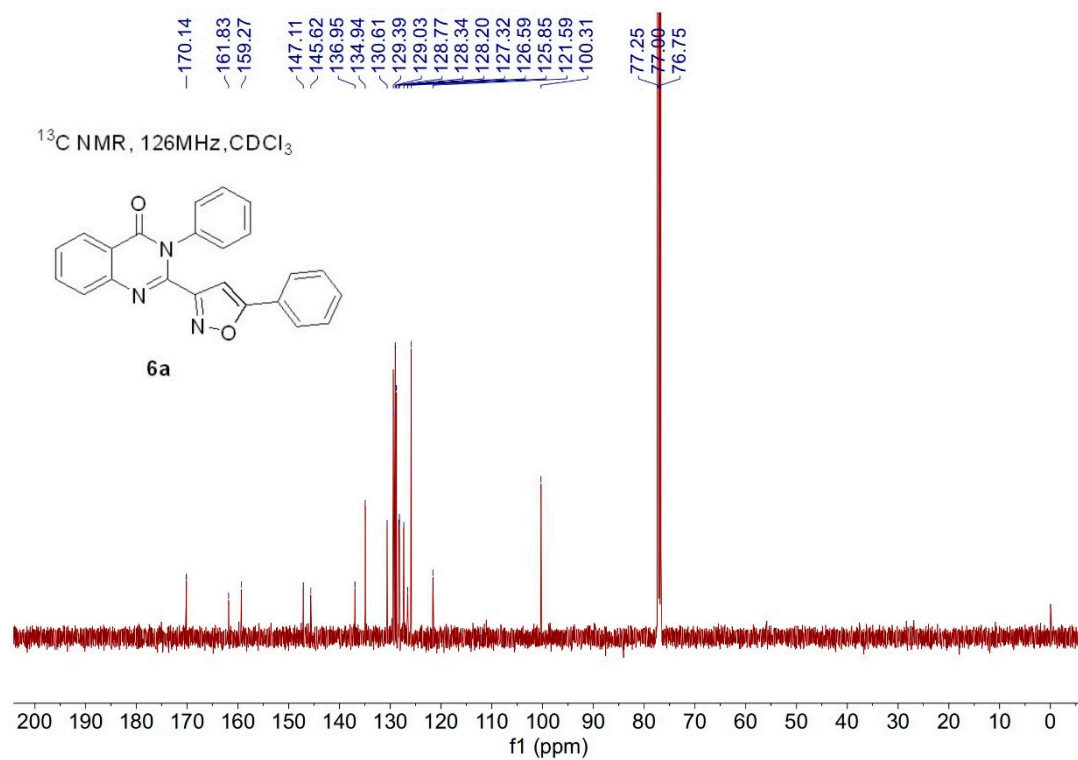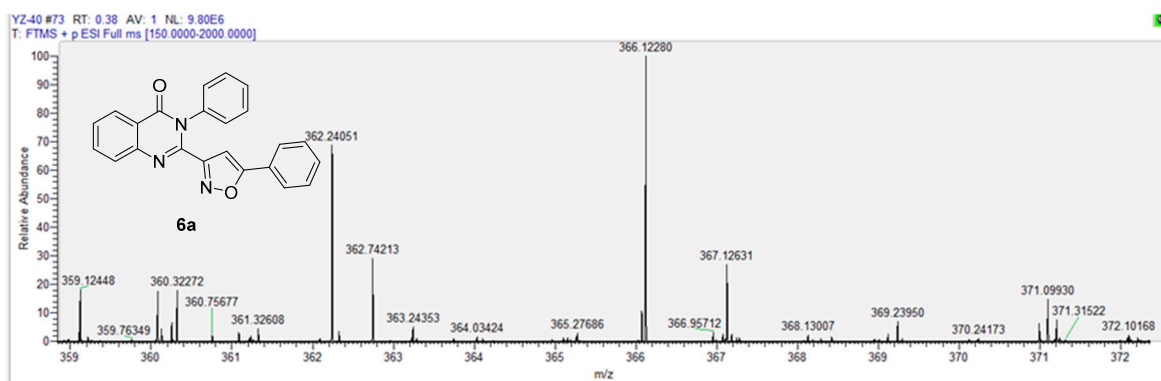

Supplement: s1 [file s1]
